# Supplementary material for: Glacial–interglacial changes and Holocene variations in Arabian Sea denitrification
Source: Copernicus journal article supplement (doi:10.5194/bg-15-507-2018), 2018-01-26
Supplement: Supplementary file 1 [file Supplement S3-S9.pdf › Supplement S3-S9.pdf]

Supplementary data for:

### **Glacial-Interglacial changes and Holocene variations in Arabian Sea denitrification**

Birgit Gaye<sup>1</sup>, Anna Böll<sup>1</sup>, Joachim Segschneider<sup>2</sup>, Nicole Burdanowitz<sup>1</sup>, Kay-Christian Emeis<sup>1,3</sup>, Venkitasubramani Ramaswamy<sup>4</sup>, Niko Lahajnar<sup>1</sup>, Andreas Lückge<sup>5</sup> and Tim Rixen<sup>1,6</sup>

<sup>1</sup>Institute for Geology, Universität Hamburg, Bundesstraße 55, 20146 Hamburg, Germany

<sup>2</sup>Institute for Geosciences, Universität Kiel, Ludewig-Meyn-Straße 10, 24118 Kiel, Germany

<sup>3</sup>Institute of Coastal Research, Helmholtz Center Geesthacht, Max-Planck-Straße 1, 21502 Geesthacht, Germany

<sup>4</sup>National Institute of Oceanography, Dona Paula, Goa, 403004, India

<sup>5</sup>Bundesanstalt für Geowissenschaften und Rohstoffe, Stilleweg 2, 30655 Hannover, Germany

<sup>6</sup>Leibniz-Zentrum für Marine Tropenforschung (ZMT) GmbH, Fahrenheitstraße 6, 28359 Bremen, Germany

**Table S1** provides  $\delta^{15}\text{N}$  data and their regional averages. References for original literature data are in Table 1.

**Table S2** provides original SST data and their regional averages. References for original literature data are in Table 1.

**Table S3** provides data of radiocarbon AMS datings for Arabian Sea cores SL163 and MC681 and **Figure S3** shows the age model for combined gravity core SL163 and multicore MC681 taken at the same location.

**Table S4** provides data of radiocarbon AMS datings for Arabian Sea core MC680 and **Figure S4** shows the age model for MC680.

**Figure S5:** KCM-PISCES simulated (average over the last 20 years of the experiment representing 0 ka, solid) and present day World Ocean Atlas (dashed, WOA13, Garcia et al. 2014) observation based oxygen concentration versus depth as average over the Arabian Sea

(55°E-75°E, 8.5°N-26°N). The simulated oxygen concentration at the surface is too high due to a cold bias in KCM compared to present day observed temperatures, resulting in generally too high oxygen concentrations, but the near surface gradient is well matched. In the deep ocean, more oxygen than observed is brought into the Arabian Sea by the deep circulation.

**Figure S6:** Horizontal distribution of the observation based (WOA2013, Garcia et al., 2014) oxygen concentration at the depth of the simulated minimum oxygen concentration (217m) from WOA data interpolated to model levels, based on the 1°x1° annual mean data.

**Figure S7:** same as Fig. 4, but for the KCM-PISCES control simulation interpolated to a 1°x1° grid. While oxygen concentrations are generally too high for reasons pointed out in the caption of Fig. 3, the lowest concentrations are in the eastern Arabian Sea as observed. Despite the deficiencies the simulation of the Arabian Sea is in the range of large scale global models and we claim that it can be used to estimate the temporal evolution of the Arabian Sea over the Holocene at least qualitatively as done here.

**Figure S8:** SST in cores of high resolution from the northern Arabian Sea (SP90-136KL; (Schulte and Muller, 2001), Oman upwelling (MD00-2354; (Böll et al., 2015), the Somali upwelling (TY93-929; (Tierney et al., 2016), and the eastern Arabian Sea (SK237-GC04; (Saraswat et al., 2013). Warm IS (IS1, IS2) and cold stadials (YD, H1) are marked by letters and grey bars.

**Figure S9:**  $\delta^{15}\text{N}$  in cores of high resolution from the northern Arabian Sea (SO90-111KL; (Suthhof et al., 2001), Oman upwelling (RC27-23; (Altabet et al., 2002), and Somali upwelling (NIOP-905P; (Ivanochko et al., 2005). Warm IS (IS1, IS2) and cold stadials (YD, H1) are marked by letters and grey bars.

**Table S3**

Results of radiocarbon AMS datings. Beta refers to Beta Analytics, Miami, FL/USA, KIA to the Leibniz Laboratory, Kiel/Germany and ETH to the ETH Laboratory of Ion Beam Physics, Zurich/Switzerland

| Core  | Depth<br>(cmbsf) | Lab Code   | Material              | Conventional<br>14C age<br>(yr BP) | Reservoir corrected<br>calibrated age<br>(cal BP) |
|-------|------------------|------------|-----------------------|------------------------------------|---------------------------------------------------|
| MC681 | 1 ± 1            | Beta342813 | mixed planktics       | 650 ± 30                           | 30 ± 30                                           |
| MC681 | 1 ± 1            | Beta342812 | bulk organic fraction | 630 ± 30                           | 10 ± 30                                           |
| MC681 | 11.5 ± 0.5       | Beta342814 | bulk organic fraction | 1300 ± 30                          | 584 ± 84                                          |
| MC681 | 33.5 ± 0.5       | Beta342815 | bulk organic fraction | 1960 ± 30                          | 1202 ± 125                                        |
| 163SL | 22.5 ± 0         | ETH        | N.dutertrei           | 1996 ± 67                          | 1234.5 ± 182.5                                    |
| 163SL | 31.5 ± 0.5       | Beta346602 | bulk organic fraction | 1980 ± 30                          | 1226 ± 126                                        |
| 163SL | 52.5 ± 0.5       | Beta346603 | bulk organic fraction | 2100 ± 30                          | 1372.5 ± 123.5                                    |
| 163SL | 58.5 ± 0.5       | Beta346604 | bulk organic fraction | 5740 ± 30                          | 5798 ± 139                                        |
| 163SL | 77.75 ± 1.25     | KIA47119   | N.dutertrei           | 5760 ± 30                          | 5832.5 ± 142.5                                    |
| 163SL | 141.25 ± 1.25    | Beta319751 | N.dutertrei           | 5990 ± 30                          | 6097 ± 149                                        |
| 163SL | 193.75 ± 1.25    | Beta319752 | N.dutertrei           | 6350 ± 40                          | 6474 ± 156                                        |
| 163SL | 252.75 ± 2.75    | KIA47120   | N.dutertrei           | 6715 ± 35                          | 6909.5 ± 177.5                                    |
| 163SL | 278.75 ± 1.25    | Beta319753 | N.dutertrei           | 6670 ± 40                          | 6839 ± 170                                        |
| 163SL | 295 ± 0          | Beta319754 | N.dutertrei           | 7030 ± 40                          | 7274 ± 129                                        |
| 163SL | 326.25 ± 1.25    | Beta319755 | N.dutertrei           | 6990 ± 40                          | 7223.5 ± 155.5                                    |
| 163SL | 353.75 ± 1.25    | KIA47121   | N.dutertrei           | 7420 ± 40                          | 7598 ± 128                                        |
| 163SL | 392.5 ± 0        | KIA47122   | N.dutertrei           | 8090 ± 40                          | 8257.5 ± 133.5                                    |
| 163SL | 395 ± 0          | Beta319756 | N.dutertrei           | 8090 ± 40                          | 8257.5 ± 133.5                                    |
| 163SL | 417.5 ± 0        | Beta342816 | N.dutertrei           | 8500 ± 40                          | 8740 ± 200                                        |

**Figure S3:**  
Age model for SL163/MC681

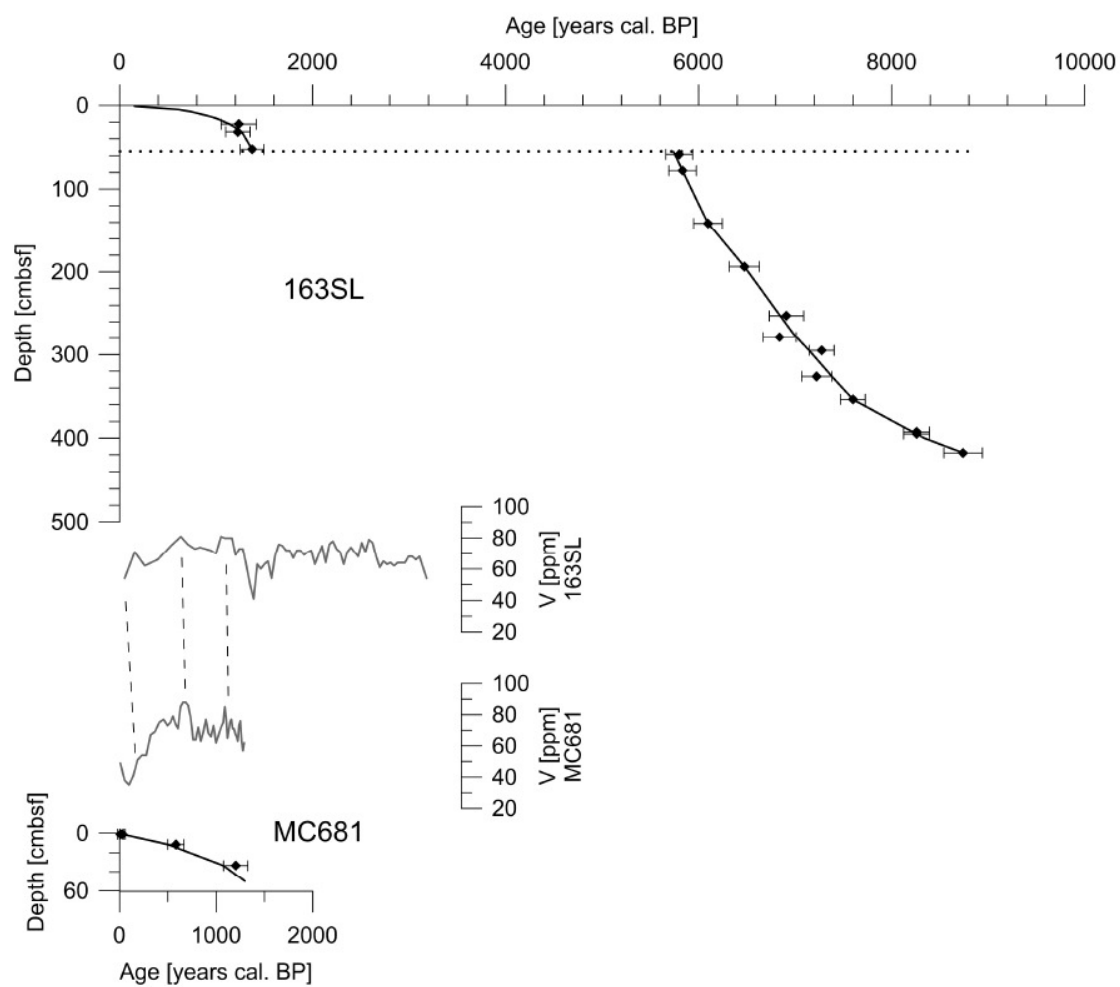

**Table S4**

Results of radiocarbon AMS datings. Beta refers to Beta Analytics, Miami, FL/USA

| Core  | Depth<br>(cmbsf) | Lab Code   | Material        | Conventional<br><sup>14</sup> C age<br>(yr BP) | Reservoir corrected<br>calibrated age<br>(cal BP) |
|-------|------------------|------------|-----------------|------------------------------------------------|---------------------------------------------------|
| MC680 | 1 ± 1            | Beta340286 | mixed planktics | 80 ± 30                                        | post 1950                                         |
| MC680 | 12 ± 2           | Beta357279 | N.dutertrei     | 600 ± 30                                       | 15 ± 38                                           |
| MC680 | 20.5 ± 1.5       | Beta357280 | mixed planktics | 810 ± 30                                       | 239 ± 179                                         |
| MC680 | 40 ± 1           | Beta357281 | mixed planktics | 5600 ± 40                                      | 5758 ± 156                                        |

**Figure S4:**

Age model for MC680

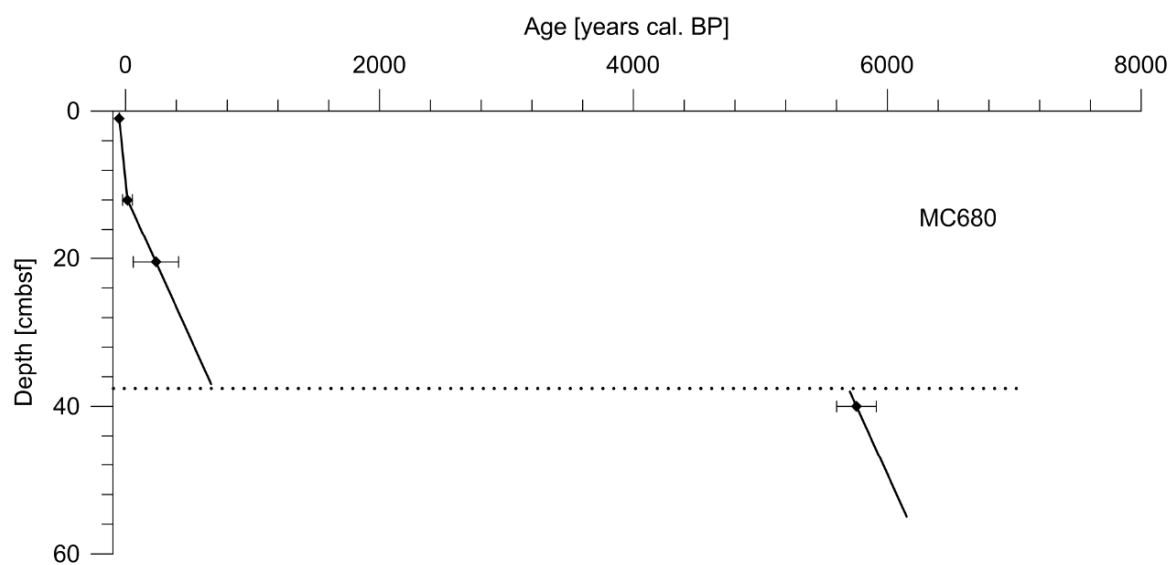

Figure S5:

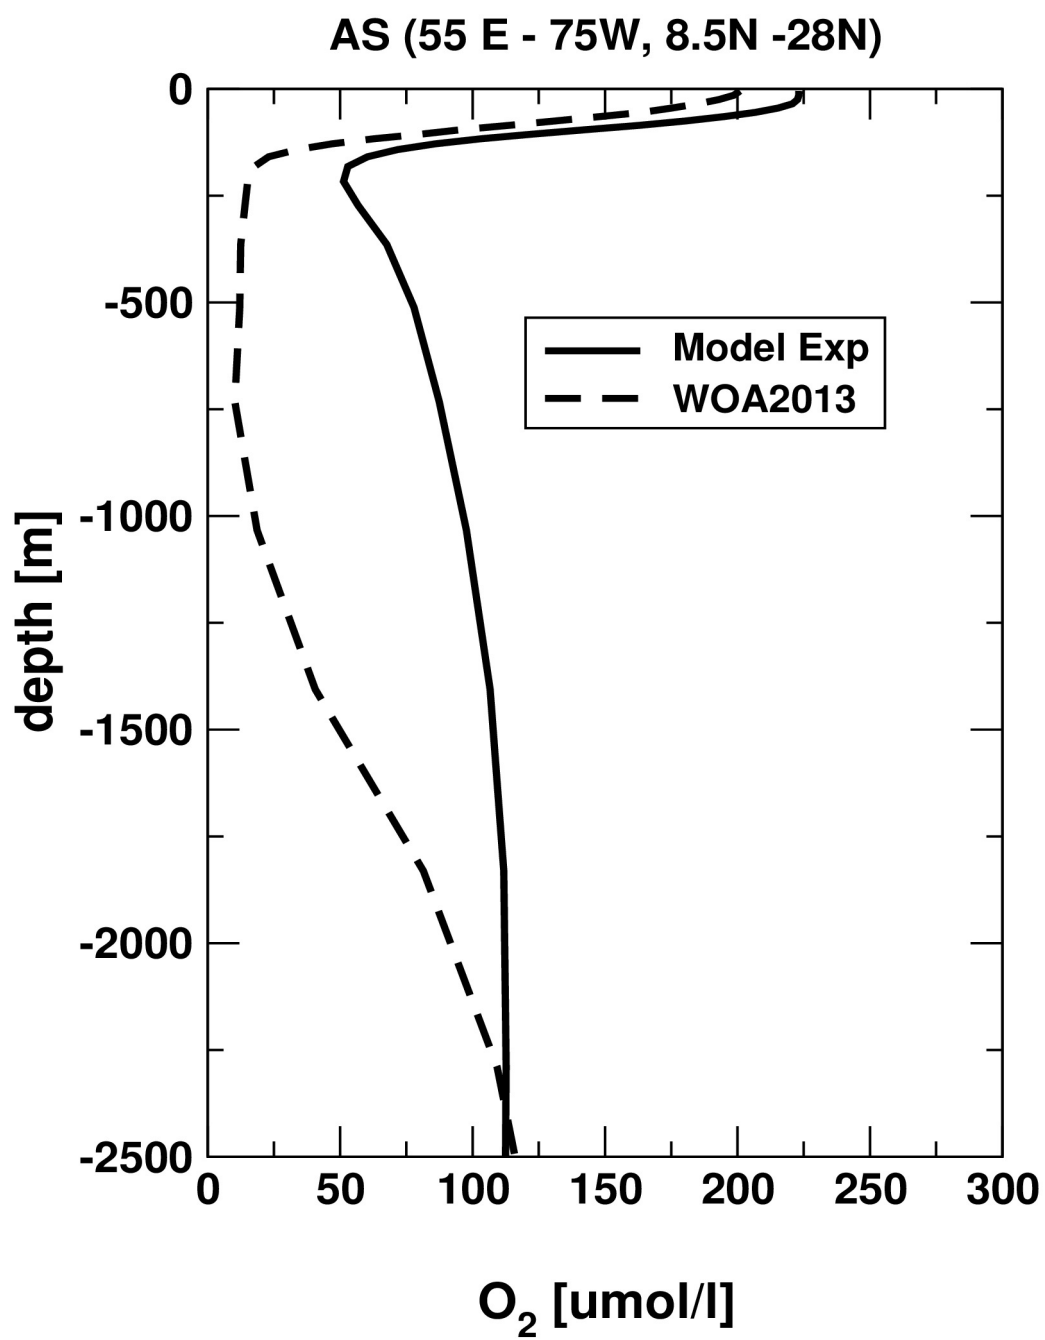

**Figure S6:**

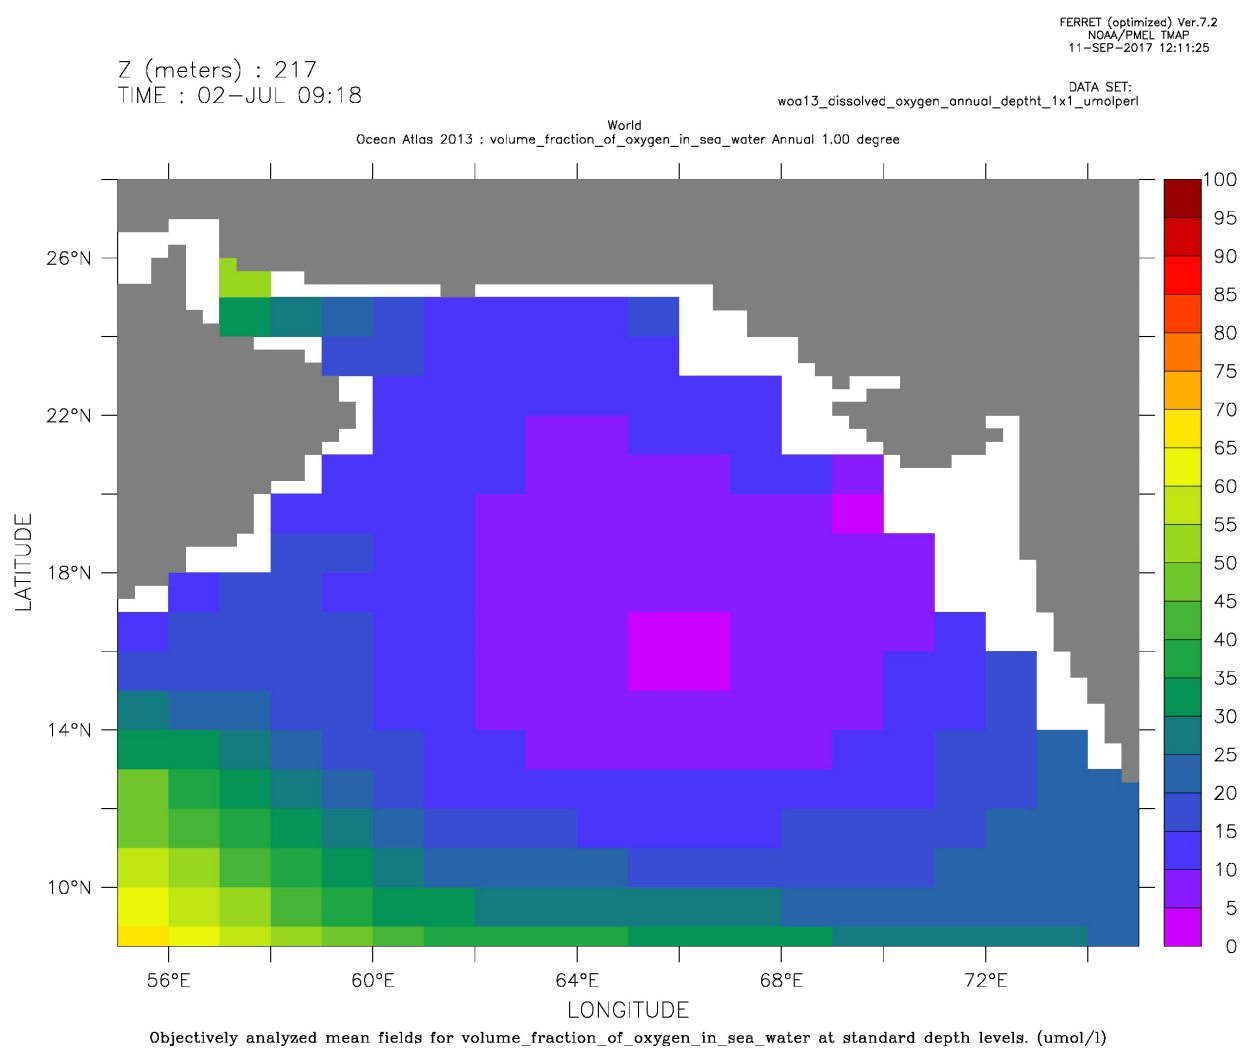

**Figure S7:**

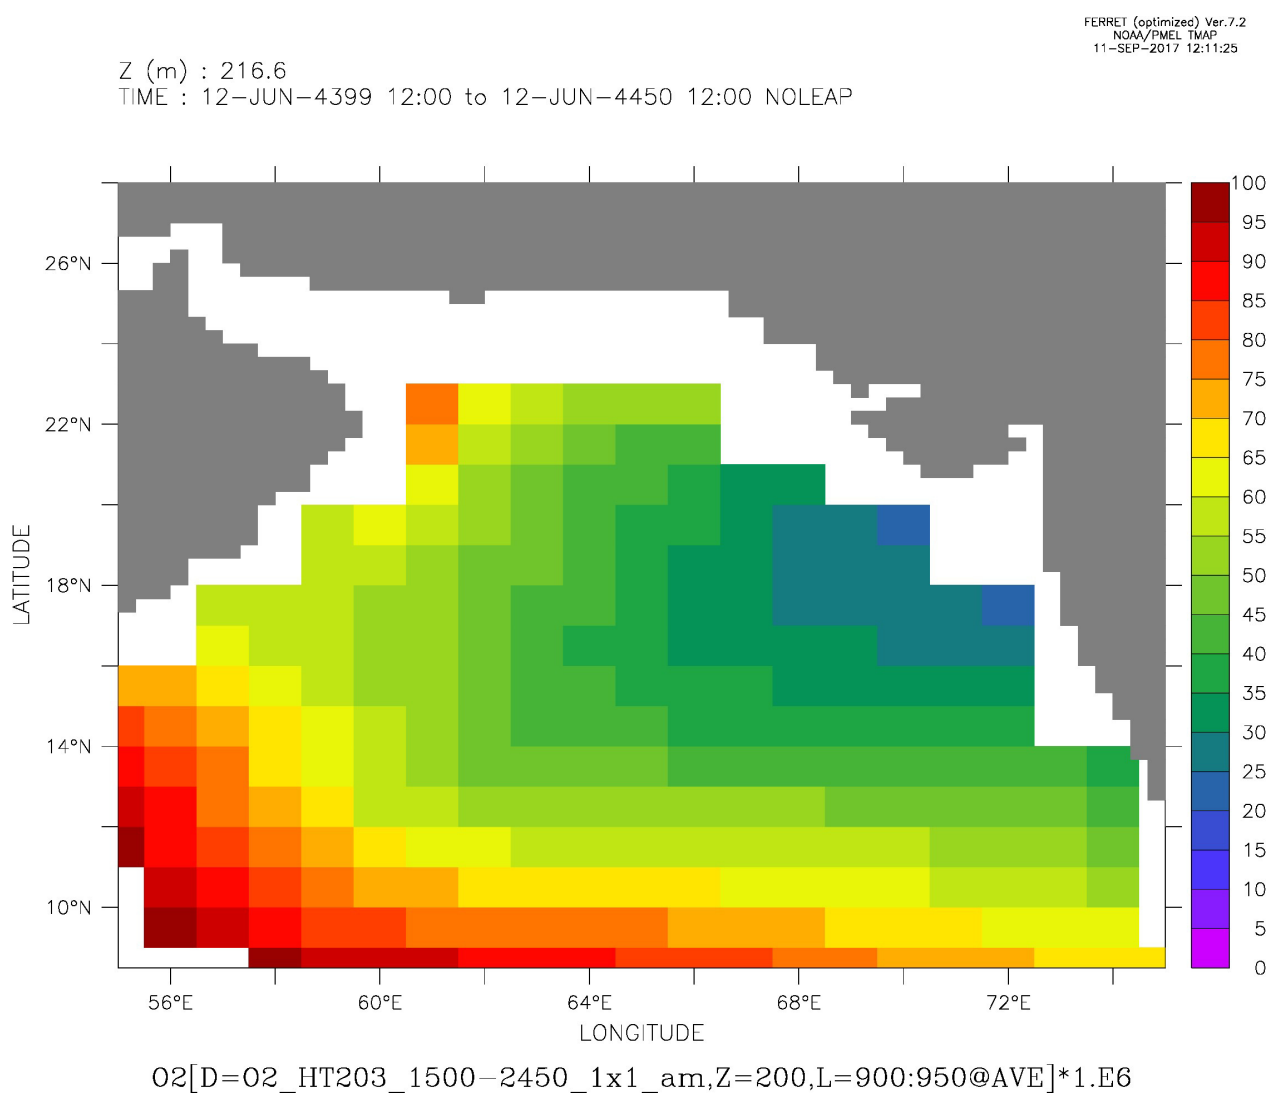



Figure S8:

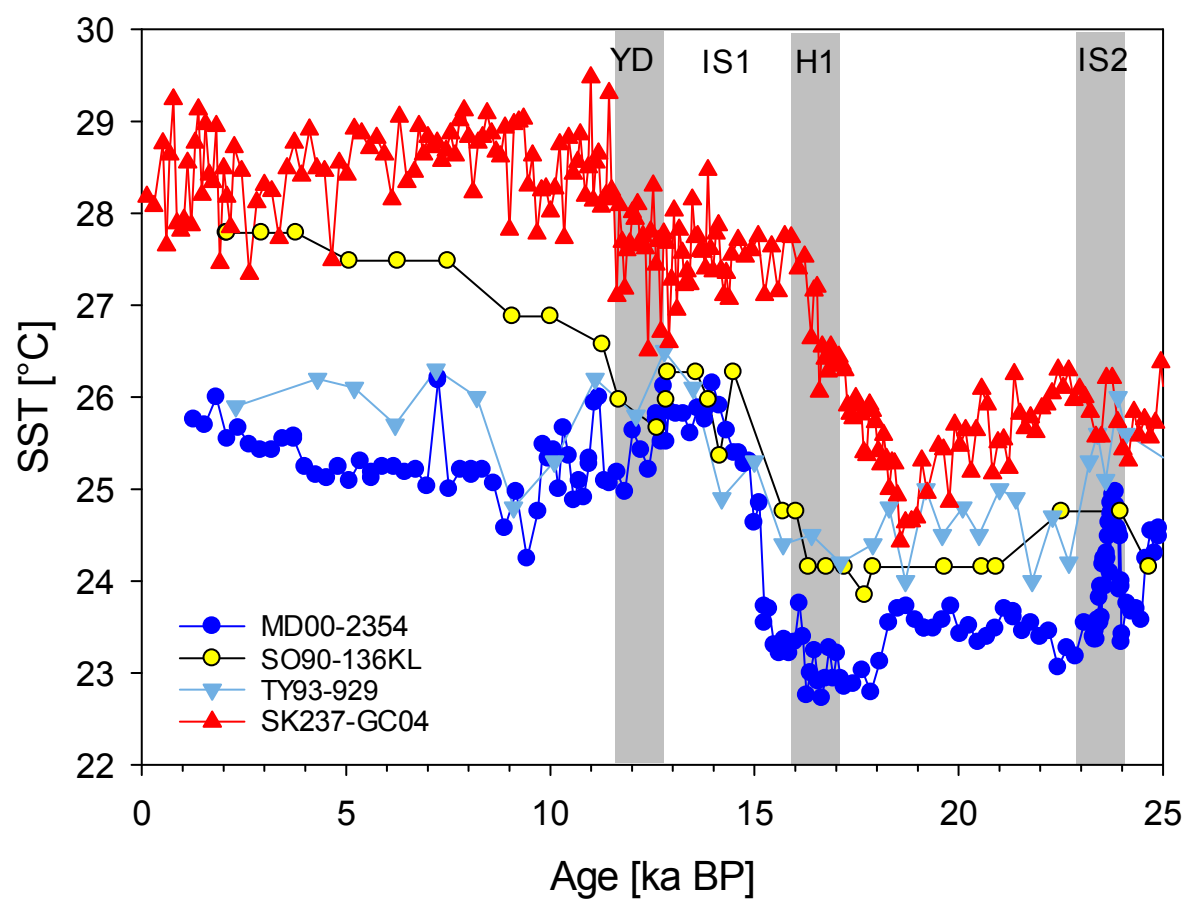

**Figure S9:**

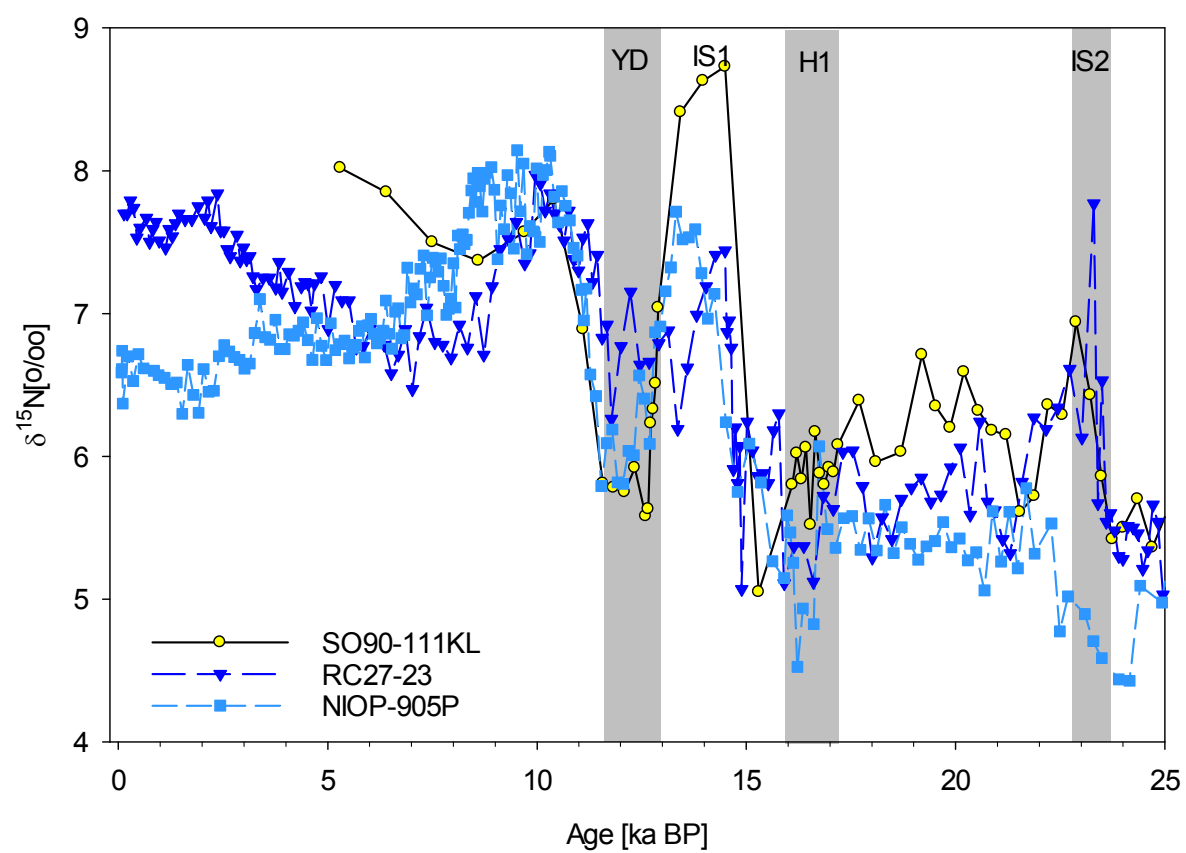

## References

- Altabet, M. A., Higginson, M. J., and Murray, D. W.: The effect of millennial-scale changes in Arabian Sea denitrification on atmospheric CO<sub>2</sub>, *Nature*, 415, 159-162, 2002.
- Böll, A., Schulz, H., Munz, P., Rixen, T., Gaye, B., and Emeis, K.-C.: Contrasting sea surface temperature of summer and winter monsoon variability in the northern Arabian Sea over the last 25ka, *Palaeogeography, Palaeoclimatology, Palaeoecology*, 426, 10-21, 2015.
- Garcia, H.E., Locarnini, R.A., Boyer, T.P., Antonov, J.I., Baranova, M.M., Reagan, J.R., and Johnson, D.R.: World Ocean Atlas 2013, Volume 3: Dissolved Oxygen, Apparent Oxygen Utilization, and Oxygen Saturation. S. Levitus, Ed., A. Mishonov Technical Ed.; NOAA Atlas NESDIS 76, 25pp, 2014.
- Ivanochko, T. S., Ganeshram, R. S., Brummer, G.-J. A., Ganssen, G., Jung, S. J. A., Moreton, S. G., and Kroon, D.: Variations in tropical convection as an amplifier of global climate change at the millennial scale, *Earth Planet. Sci. Lett.*, 235, 302-314, 2005.
- Saraswat, R., Lea, D. W., Nigam, R., Mackensen, A., and Naik, D. K.: Deglaciation in the tropical Indian Ocean driven by interplay between the regional monsoon and global teleconnections, *Earth Planet. Sci. Lett.*, 375, 166-175, 2013.
- Schulte, S. and Muller, P. J.: Variations of sea surface temperature and primary productivity during Heinrich and Dansgaard-Oeschger events in the northeastern Arabian Sea, *Geo-Mar. Lett.*, 21, 168-175, 2001.
- Suthhof, A., Ittekkot, V., and Gaye-Haake, B.: Millennial-scale oscillation of denitrification intensity in the Arabian Sea during the late Quaternary and its potential influence on atmospheric N<sub>2</sub>O and global climate, *Global Biogeochemical Cycles*, 15, 637-650, 2001.
- Tierney, J. E., Pausata, F. S. R., and deMenocal, P.: Deglacial Indian monsoon failure and North Atlantic stadials linked by Indian Ocean surface cooling, *Nat. Geosci.*, 9, 46-+, 2016.
