# Supplementary material for: Glacial–interglacial changes and Holocene variations in Arabian Sea denitrification
Source: Copernicus journal article supplement (doi:10.5194/bg-15-507-2018), 2018-01-26
Supplement: Supplementary file 1 [file Supplement Table S1_d15N Averages.xlsx]

## Sheet: Oman Upwelling
	M74-SL163/MUC 681 (944)					M74-MUC680 (943)				RC27-14				RC27-23				ODP724C						M 74-SL 163/MUC681		M74-MUC680 (943)		RC27-14		RC27-23		ODP724C		Oman upwelling
	this study					this study				Altabet et al. (2002)				Altabet et al. (2002)				Möbius et al. (2011)
	Age [cal kyrs BP]	d15N [promille]	Average d15N			Age [ka BP]	d15N [promille]	Average d15N		Age [ka BP]	d15N [promille]	Average d15N		Age [ka BP]	d15N [promille]	Average d15N		Age [ka BP]	d15N [promille]	Average d15N			Age [kyrs BP]	d15N	d15N-8.58	d15N	d15N-7.75	d15N	d15N-6.57	d15N	d15N-6.54	d15N	d15N-5.9	Average	Standard Deviation
	0.03	9.4062	9.20828			0.08	8.0369	8.51459		4.11	7.62	7.49667		0.13	7.7	7.63364		6.133	7.9				0.5	9.20828	0.63228	8.51459	0.767292			7.63364	1.09364			0.83107	0.193672
	0.0748	9.3683				0.2455	8.2533			4.281	7.41			0.207	7.7			7.0518	7.4	7.4			1.5	9.15379	0.57779	8.5469				7.62375	1.08375			0.83077	0.25298
	0.1195	9.4049				0.3873	8.5952			4.452	7.56			0.284	7.79			7.9706	7.4				2.5	9.2194	0.6439					7.57273	1.03273			0.838314	0.194414
	0.1643	9.135				0.4818	8.6691			4.622	7.61			0.361	7.74			8.8895	7.4				3.5							7.26667	0.726667			0.726667	0
	0.209	8.8				0.5764	8.5137			4.793	7.56			0.439	7.53			9.8083	7.4				4.5					7.49667	0.926667	7.18125	0.64125			0.783958	0.142708
	0.2538	8.9917				0.6371	9.0876			4.964	7.22			0.516	7.6			10.7271	5.8				5.5	8.04212	-0.533379	7.14477	-0.602533	7.20333	0.633333	6.96667	0.426667			-0.0189781	0.554359
	0.2986	9.0726				0.6865	8.4573			5.135	7.45	7.20333		0.67	7.67			11.6	4.7				6.5	8.04335	-0.532145	6.7828	-0.9645	7.06	0.49	6.78167	0.241667	7.9	2	0.247004	1.02048
	0.3433	9.176				0.7359	8.4145			5.306	7.43			0.747	7.5			13.9655	5.1				7.5	8.20503	-0.370474			7.08125	0.51125	6.77	0.23	7.4	1.5	0.467694	0.675754
	0.3881	9.012				0.7853	8.7927			5.477	7.22			0.824	7.59			16.2184	4.9				8.5	8.19955	-0.37595			7.295	0.725	6.94	0.4	7.4	1.5	0.562262	0.673128
	0.4329	9.2129				0.8347	8.4353			5.648	7.19			0.902	7.64			18.4713	4.9				9.5					7.65571	1.08571	7.55833	1.01833	7.4	1.5	1.20135	0.212962
	0.4776	8.9175				0.8841	8.4326			5.819	7.02			0.979	7.51			20.7241	5.1				10.5					8.07571	1.50571	7.63333	1.09333	5.8	-0.1	0.833016	0.680883
	0.5131	9.2866				0.9335	8.5944			5.976	6.91			1.133	7.46	7.62375		22.977	5				11.5					7.76714	1.19714	7.11429	0.574286	4.7	-1.2	0.190476	1.01556
	0.5393	9.2146				0.9829	8.4071			6.092	7.04	7.06		1.21	7.59			24.7793	5.2				12.5					6.93333	0.363333	6.802	0.262			0.312667	0.0506667
	0.5656	9.0682				1.0324	8.5469	8.5469		6.209	7.11			1.288	7.54								13.5					6.836	0.266	6.56333	0.0233333			0.144667	0.121333
	0.5918	9.2145				5.69	7.0786	7.14477		6.325	7.06			1.365	7.63								14.5					6.886	0.316	6.51636	-0.0236364	5.1	-0.8	-0.169212	0.467089
	0.618	9.182				5.81	7.2347			6.441	7.03			1.442	7.7								15.5					5.54333	-1.02667	5.9275	-0.6125			-0.819583	0.207083
	0.6443	9.288				5.93	7.121			6.557	7.15			1.596	7.66								16.5					5.5525	-1.0175	5.395	-1.145	4.9	-1	-1.05417	0.064625
	0.6705	9.146				6.05	6.5226	6.7828		6.673	7.3			1.751	7.66								17.5					5.9375	-0.6325	5.8725	-0.6675			-0.65	0.0175
	0.6967	9.1613				6.11	7.043			6.79	6.93			1.905	7.75								18.5					5.84143	-0.728571	5.552	-0.988	4.9	-1	-0.905524	0.12522
	0.7229	9.136								6.906	6.86			2.059	7.67	7.57273							19.5					6.21625	-0.35375	5.795	-0.745			-0.549375	0.195625
	0.7492	9.3591								7.022	6.98	7.08125		2.137	7.79								20.5					6.38111	-0.188889	5.838	-0.702	5.1	-0.8	-0.56363	0.267985
	0.7754	9.377								7.138	7.05			2.214	7.61								21.5					5.86333	-0.706667	5.7075	-0.8325			-0.769583	0.0629167
	0.8016	9.3957								7.255	7.15			2.368	7.84								22.5					6.265	-0.305	6.38	-0.16	5	-0.9	-0.455	0.320182
	0.8278	9.2478								7.371	7.08			2.445	7.58								23.5					6.34625	-0.22375	6.0025	-0.5375			-0.380625	0.156875
	0.8541	9.3418								7.497	7.11			2.523	7.58								24.5					4.89	-1.68	5.39222	-1.14778	5.2	-0.7	-1.17593	0.400578
	0.8803	9.1358								7.655	7.09			2.6	7.45								25.5					5.5	-1.07	5.1725	-1.3675			-1.21875	0.14875
	0.9065	9.2193								7.813	7.06			2.677	7.4								26.5
	0.9328	9.1861								7.97	7.13			2.831	7.55									M 74-SL 163		M74-MUC680 (943)		RC27-14		RC27-23		ODP 724
	0.959	9.3347								8.128	6.95	7.295		2.909	7.37								MITTELWERT	8.57551		7.74726		6.57395		6.53687		5.9
	0.9852	9.4568								8.286	7.35			2.986	7.46
	1.0114	9.513	9.15379							8.444	7.53			3.063	7.38	7.26667
	1.0377	9.3911								8.601	7.18			3.14	7.4
	1.0639	9.1224								8.759	7.36			3.217	7.26
	1.0837	9.3844								8.917	7.4			3.295	7.17
	1.097	9.1281								9.074	7.46	7.65571		3.449	7.25
	1.1103	9.1737								9.232	7.44			3.603	7.25
	1.1237	9.2875								9.39	7.72			3.758	7.18
	1.137	9.4554								9.547	7.71			3.835	7.36
	1.1503	9.3318								9.705	7.61			3.912	7.15
	1.1637	9.3626								9.842	7.74			4.067	7.29	7.18125
	1.177	9.3403								9.98	7.91			4.221	7.05
	1.1903	9.23								10.117	7.98	8.07571		4.375	7.19
	1.2037	9.0037								10.255	8.1			4.453	7.22
	1.217	9.1367								10.392	8.13			4.53	7.21
	1.2303	8.9072								10.529	8.1			4.607	7.02
	1.2437	8.8008								10.667	7.93			4.684	7.21
	1.257	8.6754								10.804	8.16			4.842	7.26
	1.2703	8.9325								10.941	8.13			5.009	6.89	6.96667
	1.2837	8.9992								11.079	7.91	7.76714		5.177	7.2
	1.297	8.9								11.216	7.92			5.344	7.09
	1.3143	9.3245								11.354	7.77			5.512	7.09
	1.4263	9.1075								11.491	8.2			5.68	6.76
	1.5383	9.2811								11.628	7.8			5.847	6.77
	1.6503	8.9431								11.766	7.15			6.015	6.89	6.78167
	1.7623	9.0716								11.903	7.62			6.182	6.84
	1.8743	8.9669								12.04	7.29	6.93333		6.35	6.78
	1.9863	9.2023								12.178	7.19			6.517	6.58
	2.0983	9.4109	9.2194							12.315	7.21			6.685	6.71
	2.2103	9.202								12.453	6.9			6.852	6.89
	2.3223	8.9569								12.59	6.31			7.02	6.47	6.77
	2.4343	9.0225								12.935	6.7			7.187	6.84
	2.5463	9.3523								13.079	6.68	6.836		7.362	7.04
	2.6583	9.3718								13.222	6.64			7.557	6.8
	5.7523	8.1413	8.04212							13.366	6.63			7.752	6.78
	5.7648	8.0246								13.509	7.17			7.948	6.69
	5.7773	7.8991								13.837	7.06			8.143	6.92	6.94
	5.79	8.1812								14.166	7.1	6.886		8.338	6.76
	5.8023	8.0239								14.494	8.13			8.533	7.12
	5.8148	8.2055								14.544	7.82			8.729	6.71
	5.8273	8.0596								14.594	7.45			8.924	7.19
	5.8398	7.9443								14.644	7.51			9.119	7.45	7.55833
	5.8648	8.1003								14.694	7.44			9.314	7.52
	5.8773	8.1365								14.744	6.82			9.51	7.64
	5.8898	8.0717								14.794	5.99			9.705	7.35
	5.9023	7.679								14.844	5.36			9.831	7.42
	5.915	7.3904								14.894	5.24			9.957	7.97
	5.9273	8.0767								15.232	5.27	5.54333		10.079	7.91	7.63333
	5.9398	8.2206								15.57	6.12			10.193	7.72
	5.9523	8.4487								15.908	5.24			10.307	7.84
	5.9648	8.1579								16.038	5.45	5.5525		10.421	7.7
	5.977	8.0862								16.168	5.54			10.534	7.62
	5.9897	7.9528								16.298	5.72			10.648	7.51
	6.0022	8.072	8.04335							16.427	5.36			10.762	7.72
	6.0147	8.0046								16.557	5.59			10.875	7.38
	6.0272	7.9082								16.687	5.57			10.989	7.3
	6.04	8.0429								16.817	5.61			11.103	7.53	7.11429
	6.0522	7.9403								16.947	5.58			11.216	7.63
	6.0647	7.7847								17.077	5.98	5.9375		11.33	7.22
	6.0789	7.8947								17.207	5.94			11.444	7.41
	6.0948	7.7316								17.336	5.8			11.558	6.83
	6.111	7.6698								17.466	5.89			11.671	6.92
	6.1275	8.0386								17.596	5.93			11.785	6.26
	6.1491	7.8758								17.726	5.93			12.011	6.77	6.802
	6.1706	8.1006								17.856	5.99			12.237	7.15
	6.185	8.1331								17.986	6.04			12.462	6.64
	6.2173	8.2192								18.116	5.73	5.84143		12.688	6.66
	6.2388	8.1352								18.246	5.66			12.914	6.79
	6.2604	8.4386								18.375	5.66			13.14	6.88	6.56333
	6.2819	8.3812								18.505	5.87			13.365	6.19
	6.303	8.4283								18.635	5.77			13.591	6.62
	6.325	8.4394								18.765	5.77			13.817	6.99
	6.3465	8.1896								18.895	6.43			14.043	7.19	6.51636
	6.3681	8.0955								19.025	6.49	6.21625		14.268	7.41
	6.3896	8.0299								19.155	6.03			14.494	7.44
	6.411	8.1114								19.284	6.49			14.544	6.87
	6.4324	8.1728								19.414	5.97			14.594	6.95
	6.4536	8.21								19.544	6.02			14.644	6.76
	6.4748	8.4251								19.674	6.21			14.694	5.91
	6.4945	8.1953								19.804	6.16			14.744	6.2
	6.513	8.1025								19.934	6.36			14.794	5.81
	6.5322	8.1652								20.064	6.62	6.38111		14.844	6.07
	6.5511	8.1806								20.193	6.44			14.894	5.07
	6.57	7.9805								20.323	6.36			15.021	6.24	5.9275
	6.5889	8.076								20.453	6.43			15.148	6.04
	6.608	8.1069								20.583	6.68			15.274	5.86
	6.6266	8.1432								20.686	6.43			15.401	5.88
	6.6455	7.9725								20.79	6.1			15.528	5.81
	6.6644	7.9537								20.893	6.45			15.655	6.18
	6.6833	7.836								20.997	5.92			15.781	6.3
	6.702	7.9604								21.1	5.76	5.86333		15.908	5.11
	6.721	7.9919								21.204	5.76			16.142	5.37	5.395
	6.7399	8.0695								21.307	5.65			16.376	5.37
	6.7588	7.8761								21.529	5.86			16.609	5.12
	6.7777	7.6257								21.751	5.93			16.843	5.72
	6.797	7.8451								21.972	6.22			17.077	5.63	5.8725
	6.8155	7.7795								22.194	6.35	6.265		17.311	6.03
	6.8343	7.9607								22.416	6.48			17.544	6.04
	6.8501	7.8093								22.638	6.08			17.778	5.79
	6.8658	7.8984								22.859	6.15			18.012	5.29	5.552
	6.8847	7.88								23.081	6.44	6.34625		18.246	5.57
	6.9036	7.9134								23.303	6.94			18.479	5.42
	6.922	8.1341								23.403	6.32			18.713	5.7
	6.9413	8.1282								23.502	6.51			18.947	5.78
	6.9602	8.0988								23.602	6.12			19.181	5.85	5.795
	6.9791	8.1412								23.701	6.44			19.414	5.68
	7.0006	8.1487	8.20503							23.801	5.87			19.648	5.73
	7.023	8.2443								23.9	6.13			19.882	5.92
	7.0461	8.2765								24	4.89	4.89		20.116	6.06	5.838
	7.0697	8.1869								24.16	5.11			20.349	5.59
	7.0948	8.3283								24.32	5.13			20.583	6.24
	7.1199	8.3723								24.48	5.21			20.764	5.68
	7.145	8.4916								24.64	5.4			20.945	5.62
	7.1676	8.4407								24.8	5.27			21.126	5.42	5.7075
	7.1901	8.4509								24.96	5.5			21.307	5.32
	7.2127	8.3686								25.12	5.54	5.5		21.592	5.82
	7.2352	8.3463								25.28	5.68			21.877	6.27
	7.258	8.2894								25.44	5.79			22.162	6.19	6.38
	7.2804	8.246								25.6	5.18			22.448	6.34
	7.3029	8.0155								25.761	5.31			22.733	6.61
	7.3255	8.0483								25.921	5.13			23.018	6.13	6.0025
	7.348	8.1781												23.303	7.77
	7.371	8.1393												23.403	5.67
	7.3942	8.3498												23.502	6.53
	7.4179	8.2567												23.602	5.54
	7.4415	8.0753												23.701	5.6
	7.4652	7.9956												23.801	5.48
	7.489	8.2201												23.9	5.3
	7.5128	8.1584												24	5.28	5.39222
	7.5372	8.0632												24.119	5.51
	7.5629	8.0966												24.239	5.5
	7.5886	8.1241												24.358	5.46
	7.634	8.0749												24.477	5.21
	7.6819	8.1414												24.597	5.34
	7.7299	8.2953												24.716	5.66
	7.778	8.0194												24.835	5.54
	7.8258	8.1689												24.955	5.03
	7.8738	8.0494												25.074	5.16	5.1725
	7.9218	8.2208												25.194	5
	7.9697	8.0893												25.313	5.48
	8.018	8.2214	8.19955											25.432	5.33
	8.0656	8.1777												25.552	4.98
														25.671	4.94
														25.79	5.15
														25.91	5.34

## Sheet: Somali Upwelling
	NIOP-905P				SS4018G					Somali Upwelling
	Ivanochko et al. (2005)				Tiwari et al. (2010)						NIOP-905P		SS4018G		Somali Upwelling
	Age [kyrs BP]	d15N [promille]	Average d15N		Age [kyrs BP]	d15N [promille]	Average d15N			Age [kyrs BP]	d15N	d15N-6.24	d15N	d15N-5.67	Average	Standard Deviation
	0.07	6.586	6.6036		0	6.55	6.775			0.5	6.6036	0.3636	6.775	1.105	0.7343	0.3707
	0.08	6.612			0.541	7				1.5	6.464	0.224	6.235	0.565	0.3945	0.1705
	0.09	6.74			1.085	6.22	6.235			2.5	6.63825	0.39825	5.99	0.32	0.359125	0.039125
	0.105	6.37			1.63	6.25				3.5	6.81589	0.575889	5.815	0.145	0.360444	0.215444
	0.229	6.7			2.174	5.87	5.99			4.5	6.82511	0.585111	5.445	-0.225	0.180056	0.405056
	0.353	6.527			2.718	6.11				5.5	6.80982	0.569818	5.555	-0.115	0.227409	0.342409
	0.478	6.716			3.263	5.97	5.815			6.5	6.9395	0.6995	5.58667	-0.0833333	0.308083	0.391417
	0.602	6.617			3.807	5.66				7.5	7.22527	0.985267	5.89333	0.223333	0.6043	0.380967
	0.85	6.599			4.352	4.96	5.445			8.5	7.72441	1.48441	5.84333	0.173333	0.828873	0.655539
	0.96	6.569			4.896	5.93				9.5	7.73315	1.49315	5.72	0.05	0.771577	0.721577
	1.1	6.55	6.464		5.441	5.53	5.555			10.5	7.77533	1.53533	5.735	0.065	0.800167	0.735167
	1.259	6.506			5.81	5.58				11.5	6.46456	0.224556	6.35	0.68	0.452278	0.227722
	1.391	6.518			6.18	5.37	5.58667			12.5	6.33662	0.096625	4.9525	-0.7175	-0.310437	0.407062
	1.524	6.298			6.55	5.6				13.5	7.44614	1.20614	5.33333	-0.336667	0.434738	0.771405
	1.657	6.641			6.92	5.79				14.5	6.523	0.283	4.9225	-0.7475	-0.23225	0.51525
	1.789	6.43			7.29	5.96	5.89333			15.5	5.581	-0.659	5.562	-0.108	-0.3835	0.2755
	1.913	6.305			7.66	6.13				16.5	5.224	-1.016	5.15333	-0.516667	-0.766333	0.249667
	2.036	6.611	6.63825		7.925	5.59				17.5	5.4836	-0.7564	5.124	-0.546	-0.6512	0.1052
	2.158	6.452			8.198	5.76	5.84333			18.5	5.4434	-0.7966			-0.7966
	2.28	6.459			8.472	5.69				19.5	5.3916	-0.8484			-0.8484
	2.403	6.702			8.745	6.08				20.5	5.34	-0.9			-0.9
	2.525	6.778			9.018	5.55	5.72			21.5	5.4372	-0.8028			-0.8028
	2.647	6.734			9.291	6.28				22.5	5.10767	-1.13233			-1.13233
	2.77	6.695			9.564	5.77				23.5	4.65675	-1.58325			-1.58325
	2.892	6.675			9.837	5.28				24.5	4.83267	-1.40733			-1.40733
	3.014	6.615	6.81589		10.12	5.83	5.735			25.5	5.51033	-0.729667			-0.729667
	3.137	6.649			10.289	6.41				26.5
	3.259	6.864			10.458	5.08
	3.381	7.102			10.627	5.98
	3.504	6.835			10.796	5.75
	3.626	6.817			10.965	5.36
	3.748	6.957			11.281	5.36	6.35
	3.862	6.752			11.597	7.56				Average	6.24357		5.66617
	3.972	6.752			11.913	6.13
	4.082	6.855	6.82511		12.229	5.84	4.9525
	4.192	6.846			12.544	4.12
	4.302	6.88			12.86	4.67
	4.413	6.939			12.95	5.18
	4.523	6.815			13.04	4.86	5.33333
	4.633	6.675			13.13	4.96
	4.743	6.967			13.22	6.06
	4.853	6.775			13.47	5.47
	4.963	6.674			13.72	5.49
	5.073	6.933	6.80982		13.97	5.16
	5.183	6.745			14.22	5.7	4.9225
	5.293	6.787			14.47	4.61
	5.403	6.811			14.72	4.55
	5.513	6.687			14.892	4.83
	5.603	6.761			15.064	5.48	5.562
	5.675	6.781			15.236	6.08
	5.746	6.879			15.408	6.21
	5.817	6.913			15.58	4.5
	5.889	6.692			15.834	5.54
	5.96	6.919			16.088	6.18	5.15333
	6.031	6.963	6.9395		16.342	4.38
	6.103	6.86			16.596
	6.174	6.792			16.85
	6.245	6.825			16.938	4.9
	6.317	6.88			17.026	5.02	5.124
	6.388	7.092			17.114	5.32
	6.467	6.859			17.202	4.09
	6.539	6.754			17.29	5.77
	6.611	7.013			17.866	5.42
	6.683	7.037			18.443	4.92	18.443
	6.755	6.828			19.02	5.02	19.02
	6.827	6.85
	6.899	7.321
	6.976	7.079
	7.055	7.175	7.22527
	7.133	7.135
	7.212	7.313
	7.29	7.407
	7.369	6.989
	7.444	7.253
	7.509	7.391
	7.574	7.362
	7.639	7.294
	7.704	7.386
	7.769	7.194
	7.834	6.99
	7.893	7.034
	7.946	7.104
	7.999	7.352
	8.053	7.043	7.72441
	8.106	7.547
	8.159	7.452
	8.213	7.556
	8.266	7.486
	8.319	7.516
	8.373	7.706
	8.426	7.863
	8.479	7.948
	8.532	7.782
	8.586	7.985
	8.639	7.891
	8.692	7.715
	8.746	7.944
	8.799	7.987
	8.906	8.027
	8.981	7.867
	9.058	7.381	7.73315
	9.135	7.757
	9.213	7.592
	9.29	7.97
	9.368	7.842
	9.445	7.455
	9.522	8.144
	9.6	7.717
	9.677	8.051
	9.754	7.416
	9.832	7.613
	9.909	7.575
	9.987	8.018
	10.064	7.502	7.77533
	10.141	7.972
	10.22	8.005
	10.286	8.133
	10.314	8.104
	10.407	7.818
	10.5	7.638
	10.593	7.859
	10.686	7.755
	10.779	7.653
	10.873	7.46
	10.966	7.405
	11.059	7.167	6.46456
	11.122	6.953
	11.185	7.174
	11.281	6.574
	11.411	6.422
	11.54	5.792
	11.67	6.093
	11.8	6.188
	11.93	5.818
	12.059	5.807	6.33662
	12.189	6.038
	12.317	6.009
	12.443	6.567
	12.569	6.405
	12.695	6.087
	12.822	6.87
	12.948	6.91
	13.074	7.157	7.44614
	13.2	7.324
	13.323	7.713
	13.476	7.52
	13.628	7.534
	13.781	7.591
	13.933	7.284
	14.086	6.965	6.523
	14.238	7.138
	14.516	6.239
	14.794	5.75
	15.072	6.089	5.581
	15.349	5.817
	15.627	5.265
	15.905	5.147
	15.978	5.587
	16.05	5.467	5.224
	16.123	5.254
	16.225	4.526
	16.354	4.934
	16.614	4.826
	16.743	6.07
	16.937	5.491
	17.134	5.358	5.4836
	17.332	5.567
	17.53	5.581
	17.727	5.346
	17.925	5.566
	18.122	5.341	5.4434
	18.32	5.662
	18.518	5.323
	18.715	5.503
	18.913	5.388
	19.111	5.277	5.3916
	19.308	5.37
	19.506	5.407
	19.704	5.54
	19.901	5.364
	20.099	5.425	5.34
	20.296	5.271
	20.494	5.328
	20.692	5.061
	20.889	5.615
	21.087	5.263	5.4372
	21.285	5.611
	21.486	5.217
	21.687	5.777
	21.888	5.318
	22.289	5.53	5.10767
	22.49	4.774
	22.69	5.019
	23.091	4.896	4.65675
	23.292	4.706
	23.493	4.587
	23.9	4.438
	24.157	4.428	4.83267
	24.414	5.094
	24.929	4.976
	25.186	5.504	5.51033
	25.443	5.256
	25.958	5.771

## Sheet: Western AS open ocen
	SO42-74KL				MC2-GOA6				MC2-GOA4				ODP722B					Wester AS open ocean		74KL		MC2-GOA6		MC2-GOA4		ODP722B
	Suthhof et al. (2002)				Isaji et al. (2015)				Isaji et al. (2015)				Möbius et al. (2011)
	Age [kyrs BP]	d15N [promille]	Average d15N		Age [kyrs BP]	d15N [promille]	Average d15N		Age [kyrs BP]	d15N [promille]	Average d15N		Age [ka BP]	d15N [promille]	Average d15N				Age [kyrs BP]	d15N	d15N-8.16	d15N	d15N-8.16	d15N	d15N-8.16	d15N	d15N-7.12	Average	Standard Deviation
	0.25	9	8.475		2.02	8.44			16.298	7.42			6	8.31					0.5	8.475	0.315							0.315
	0.5	8.4			5.16	8.67			18	6.89			7.344	8.14	8.235				1.5	7.9	-0.26							-0.26
	0.75	8.1			7.24	8.87	8.705		19.702	7.6			7.904	8.33					2.5	8.21667	0.0566667	8.44	0.28					0.168333	0.111667
	0.97	8.4			7.93	8.54			21.4057	7.44			9.248	7.77					3.5	8.3	0.14							0.14
	1.19	7.7	7.9		10.69	9.66			24.8096	6.98			10.816	7.99					4.5	8.53333	0.373333							0.373333
	1.42	7.9			13.88	9.06							11.6	6.45					5.5	8.65	0.49	8.67	0.51					0.5	0.01
	1.64	8.1			15.66	9.01							13.5437	6.54					6.5	8.4	0.24					8.31	1.19	0.715	0.475
	2.09	7.7	8.21667		17.21	7.13							15.6641	6.56					7.5	9.06667	0.906667	8.705	0.545			8.235	1.115	0.855556	0.235491
	2.32	8.2			19.22	7.64							17.0777	7.03					8.5	8.975	0.815							0.815
	2.54	8.4			20.77	7.49							18.8447	6.86					9.5	9.3	1.14					7.77	0.65	0.895	0.245
	2.77	8.1			22.16	7.08							20.6117	7.14					10.5	9.5	1.34	9.66	1.5			7.99	0.87	1.23667	0.267374
	2.99	8.6			24.39	7.12							22.3786	7.15					11.5	9.1	0.94					6.45	-0.67	0.135	0.805
	3.55	8.3			26.62	7.5							24.499	6.53					12.5	8.275	0.115							0.115
	4.23	8.2	8.53333										25.9126	6.7					13.5	8.65	0.49	9.06	0.9			6.54	-0.58	0.27	0.623912
	4.57	8.9																	14.5	8.26667	0.106667							0.106667
	4.91	8.5																	15.5	6.925	-1.235					6.56	-0.56	-0.8975	0.3375
	5.24	8.8	8.65																16.5	6.3	-1.86	9.01	0.85	7.42	-0.74			-0.583333	1.11189
	5.58	8.4																	17.5	7.3	-0.86	7.13	-1.03			7.03	-0.09	-0.66	0.408982
	5.92	9																	18.5	7.625	-0.535			6.89	-1.27	6.86	-0.26	-0.688333	0.426348
	6.32	8.4																	19.5	7.64	-0.52	7.64	-0.52	7.6	-0.56			-0.533333	0.0188562
	7.12	8.8	9.06667																20.5	7.4	-0.76	7.49	-0.67			7.14	0.02	-0.47	0.348425
	7.52	9.1																	21.5	7.4	-0.76			7.44	-0.72			-0.74	0.02
	7.92	9.3																	22.5	7.7	-0.46	7.08	-1.08			7.15	0.03	-0.503333	0.45419
	8.32	9.1	8.975																23.5	8.05	-0.11							-0.11
	8.5	8.6																	24.5			7.12	-1.04	6.98	-1.18	6.53	-0.59	-0.936667	0.251705
	8.69	9.1																	25.5							6.7	-0.42	-0.42
	8.88	9.1																	26.5
	9.07	9.3	9.3																	74KL						ODP 722
	9.46	9.5																	Average	8.16451						7.12
	9.85	9.1
	10.24	9.4	9.5
	10.64	9.6
	11.03	8.8	9.1
	11.42	9.1
	11.81	9.4
	12.02	8.8	8.275
	12.44	8.2
	12.65	7.7
	12.86	8.4
	13.07	8.1	8.65
	13.28	8.7
	13.59	8.7
	13.9	9.1
	14.22	8.6	8.26667
	14.53	8.5
	14.84	7.7
	15.07	7.1	6.925
	15.3	6.8
	15.53	7
	15.99	6.8
	16.51	6.5	6.3
	16.79	6.1
	17.08	7.6	7.3
	17.37	7.2
	17.66	7.1
	17.95	7.3
	18.24	7.8	7.625
	18.46	7.3
	18.69	7.8
	18.86	7.6
	19.04	7.8	7.64
	19.21	7.1
	19.38	7.9
	19.55	7.8
	19.73	7.6
	20.31	7.4	7.4
	20.89	7.4
	21.47	7.4
	22.05	7.6	7.7
	22.63	7.8
	23.21	8	8.05
	23.79	8.1

## Sheet: Northern AS
	SO130-275KL				SO 90-111KL				MD04-2876				NAST				MD04-2879			NIOP455			NIOP464							MD-04 2876		SO130-275KL		NIOP455		SO90-111KL		MD04-2879		NIOP464		NAST		Norther Arabian Sea
	Böll et al. (2014)				Suthhof et al. (2002)				Pichevin et al. (2007)				Möbius et al. (2011)				Jaeschke et al. (2009)			Reichart et al. (1998)			Reichart et al. (1998)						Age [kyrs BP]	d15N	d15N-5.11	d15N	d15N-6.11	d15N	d15N-5.89	d15N	d15N-6.65	d15N	d15N-6.75	d15N	d15N-6.64	d15N	d15N-8.09	Average	Standard Deviation
	Age [kyrs BP]	d15N [promille]	Average d15N		Age [kyrs BP]	d15N [promille]	Average d15N		Age [kyrs BP]	d15N [promille]	Average d15N		Age [kyrs BP]	d15N [promille]	Average d15N		Age [kyrs BP]	d15N [promille]		Average d15N	Age [kyrs BP]		Average d15N	Age [kyrs BP]					-0.2			7.91006	1.80006											1.80006
	-0.0375	8.0154	7.91006		5.3	8.02			0.09	8	7.0712		0.1	10.46			10.14	7.76		9	7.29		10.1	7.68					0.5	7.0712	1.9612	7.96464	1.85464									10.46	2.37	2.06195	0.222127
	-0.0345	8.0009			6.4	7.85			0.094	7.31			1.7	10.49			12.8	7.28		10.5	8.06		11.2	8.1					1.5	6.75667	1.64667	7.83892	1.72892									10.49	2.4	1.9252	0.337412
	-0.0285	7.8963			7.5	7.5			0.106	6.9			3.2	10.61			15.6	7.51		12.2	5.6		13	7.27					2.5	6.377	1.267	7.91743	1.80743											1.53722	0.270215
	-0.025	7.9992			8.6	7.37			0.12	6.98			4.8	9.92			19.281	5.41		14.5	7.33		14.5	5.74					3.5	5.97556	0.865556											10.61	2.52	1.69278	0.827222
	-0.022	7.7776			9.7	7.57			0.137	7.52			6.3	9.62			23.842	5.77		15.3	4.47		18.9	5.34					4.5	5.85125	0.74125											9.92	1.83	1.28563	0.544375
	-0.015	7.8303			10.4	7.8			0.157	7.08			7.8	9.16						17.3	4.63		22.6	6.35					5.5	5.7675	0.6575					8.02	1.37							1.01375	0.35625
	-0.011	7.9095			11.1	6.89	6.16		0.178	6.46			9.7	7.24						18.5	5.3		24.2	5.97					6.5	5.75714	0.647143					7.85	1.2					9.62	1.53	1.12571	0.364232
	-0.0075	7.8513			11.58	5.81			0.203	7.25			11.6	6.72						19.9	5.99		26.3	5.94					7.5	5.40875	0.29875					7.5	0.85					9.16	1.07	0.739583	0.324397
	0	7.7747	7.96464		11.83	5.78			0.229	7.42			13.5	8.01						22.1	6.06								8.5	5.30333	0.193333					7.37	0.72							0.456667	0.263333
	0.0025	7.9731			12.09	5.75	6.12375		0.258	7.24			15.4	6.67						23.9	4.74								9.5	5.29	0.18			7.29	1.39	7.57	0.92					7.24	-0.85	0.41	0.845725
	0.006	8.2046			12.34	5.92			0.289	6.99			17.3	5.79	6.22					25.3	5.36								10.5	5.17429	0.0642857			8.06	2.16	7.8	1.15	7.76	1.01	7.68	1.04			1.08486	0.664734
	0.0125	8.1245			12.6	5.58			0.322	7.48			17.9	6.65						26.8	3.71								11.5	3.42333	-1.68667					6.16	-0.49			8.1	1.46	6.72	-1.37	-0.521667	1.22524
	0.0155	8.0671			12.66	5.63			0.357	7.14			18.5	8.01															12.5	5.25583	0.145833			5.6	-0.3	6.12375	-0.52625	7.28	0.53					-0.0376042	0.407262
	0.0195	8.0851			12.72	6.23			0.394	6.56			19	8.18	7.82														13.5	6.14923	1.03923					7.705	1.055			7.27	0.63	8.01	-0.08	0.661058	0.460526
	0.026	7.8435			12.78	6.33			0.434	7.13			19.7	7.46															14.5	3.50875	-1.60125			7.33	1.43	8.73	2.08			5.74	-0.9			0.252188	1.54037
	0.0295	8.0205			12.84	6.51			0.475	7.18			20.3	7.16	7.225														15.5	3.44875	-1.66125			4.47	-1.43	5.05	-1.6	7.51	0.76			6.67	-1.42	-1.07025	0.919943
	0.033	7.9804			12.9	7.04			0.519	7.32			20.9	7.29															16.5	3.75	-1.36					5.89	-0.76							-1.06	0.3
	0.039	8.0183			13.43	8.41	7.705		0.565	6.97			21.5	6.96															17.5	4.2775	-0.8325			4.63	-1.27	6.12	-0.53					6.22	-1.87	-1.12563	0.503892
	0.0415	8.0262			13.97	8.63			0.612	7.26			22	7.71	7.455														18.5	4.802	-0.308			5.3	-0.6	5.995	-0.655			5.34	-1.3	8.01	-0.08	-0.5886	0.411835
	0.044	8.1484			14.5	8.73			0.662	7.27			22.6	7.2															19.5	4.656	-0.454			5.99	0.09	6.42	-0.23	5.41	-1.34			7.82	-0.27	-0.4408	0.482513
	0.0505	8.0383			15.3	5.05			0.714	7.07			23.2	5.39	6.085														20.5	4.77429	-0.335714					6.36333	-0.286667					7.225	-0.865	-0.495794	0.261835
	0.052	8.0599			16.1	5.8	5.89		0.822	6.69			23.8	6.78															21.5	4.774	-0.336					5.82667	-0.823333					6.96	-1.13	-0.763111	0.326934
	0.056	7.7249			16.21	6.02			0.879	6.35			24.4	8.32															22.5	5.222	0.112			6.06	0.16	6.53	-0.12			6.35	-0.29	7.455	-0.635	-0.1546	0.289953
	0.0566	8.2645			16.32	5.84			0.938	6.74			25	6.88	6.645														23.5	4.984	-0.126			4.74	-1.16	5.90333	-0.746667	5.77	-0.98			6.085	-2.005	-1.00353	0.610576
	0.0571	7.9892			16.43	6.06			0.999	6.47			25.6	6.41															24.5	4.455	-0.655					5.52	-1.13			5.97	-0.67	8.32	0.23	-0.55625	0.49246
	0.0574	8.0427			16.54	5.52			1.061	6.74	6.75667																		25.5	4.578	-0.532			5.36	-0.54	5.15667	-1.49333					6.645	-1.445	-1.00258	0.466905
	0.07	8.2899			16.65	6.17			1.126	6.61																			26.5
	0.0894	7.6598			16.76	5.88			1.191	7.25																			Average	5.11				5.89364		6.6478		6.746		6.63571		8.08632
	0.0967	8.0871			16.87	5.8			1.259	6.72
	0.1274	8.1041			16.98	5.92			1.328	6.88
	0.1657	7.9497			17.09	5.89	6.12		1.471	6.71
	0.181	8.2884			17.2	6.08			1.544	6.86
	0.1995	8.3542			17.7	6.39			1.62	6.7
	0.2422	7.655			18.1	5.96	5.995		1.696	6.15
	0.2574	8.0514			18.7	6.03			1.775	6.67
	0.2805	7.7063			19.2	6.71	6.42		1.854	6.93
	0.3036	8.0866			19.53	6.35			1.935	6.86
	0.3191	7.9887			19.87	6.2			2.018	6.55	6.377
	0.3345	7.7356			20.2	6.59	6.36333		2.102	6.62
	0.3702	8.3138			20.54	6.32			2.273	6.39
	0.3994	8.3891			20.87	6.18			2.361	6.23
	0.4295	8.0787			21.21	6.15	5.82667		2.45	6.68
	0.4595	7.7816			21.54	5.61			2.54	6.42
	0.4751	7.7934			21.88	5.72			2.631	6.25
	0.5011	8.0136			22.21	6.36	6.53		2.724	6.31
	0.5271	7.5572			22.55	6.29			2.817	6.34
	0.5531	7.8344			22.88	6.94			2.912	5.98
	0.5785	7.9007			23.22	6.43	5.90333		3.008	6.27	5.97556
	0.6175	8.0347			23.49	5.86			3.203	5.95
	0.6477	7.6483			23.75	5.42			3.302	5.66
	0.6803	7.9043			24	5.5	5.52		3.402	6.06
	0.7247	7.7009			24.35	5.7			3.503	5.85
	0.7584	8.2994			24.7	5.36			3.605	6.07
	0.7747	7.8219			25.06	5.62	5.15667		3.708	6.12
	0.7992	8.0266			25.41	5.15			3.812	5.98
	0.8074	7.4498			25.77	4.7			3.917	5.82
	0.8327	7.7902							4.044	5.8	5.85125
	0.8625	8.0405							4.236	6.18
	0.8922	8.0659							4.345	5.95
	0.919	7.7971							4.454	5.51
	0.9339	7.7772							4.563	5.74
	0.9696	7.974							4.674	6.06
	0.9756	7.9078							4.785	5.8
	0.9937	7.7763							4.897	5.77
	1.0151	8.4949	7.83892						5.01	5.82	5.7675
	1.0586	7.7379							5.123	5.54
	1.0731	8.0342							5.352	5.56
	1.0876	7.3093							5.467	5.85
	1.1325	7.8905							5.583	5.81
	1.1928	7.5185							5.699	5.74
	1.2133	8.0126							5.816	5.96
	1.2336	8.3247							5.933	5.86
	1.2627	8.5075							6.051	5.98	5.75714
	1.2705	7.45							6.17	5.64
	1.2842	7.7136							6.289	5.5
	1.298	8.2469							6.529	5.96
	1.3185	7.7908							6.649	5.77
	1.3391	7.8109							6.77	5.78
	1.3575	7.4213							6.891	5.67
	1.3741	7.5894							7.013	5.67	5.40875
	1.385	7.9289							7.135	5.59
	1.3992	7.3392							7.257	5.85
	1.408	7.7329							7.38	5.24
	1.4386	8.4747							7.528	5.18
	1.4565	7.9952							7.75	5.34
	1.4713	7.0741							7.874	5.42
	1.4773	7.7802							7.998	4.98
	1.4817	7.8329							8.123	5.02	5.30333
	1.5218	7.7672							8.248	5.64
	1.534	8.4313							8.373	5.36
	1.5513	8.239							8.498	4.93
	1.5639	8.4276							8.623	5.65
	1.5921	7.8012							8.749	5.22
	1.6135	8.0675							9.001	5.32	5.29
	1.6344	7.2152							9.127	5.4
	1.6522	8.1818							9.253	5.05
	1.6571	7.8642							9.379	5.61
	1.6717	7.9505							9.506	5.21
	1.6978	7.8271							9.632	5.07
	1.7098	7.8667							9.759	5.33
	1.7331	8.0182							9.886	5.33
	1.7553	7.7187							10.013	5.37	5.17429
	1.7955	7.8342							10.266	5.89
	1.8095	7.8402							10.393	5.43
	1.8245	7.5668							10.52	5.48
	1.8407	7.8087							10.647	5.25
	1.8548	7.6384							10.774	4.62
	1.8772	7.6321							10.901	4.18
	1.8997	7.9732							11.028	4.33	3.42333
	1.9146	7.638							11.155	3.96
	1.9444	7.8706							11.308	4
	1.9712	7.4993							11.308	3.23
	1.9967	7.4183							11.409	3.08
	2.0396	7.879	7.91743						11.536	2.85
	2.0887	7.6895							11.663	2.73
	2.1122	7.9393							11.789	3.01
	2.1608	7.7962							11.916	3.62
	2.1788	7.9558							12.042	4.12	5.25583
	2.1908	8.0668							12.169	4.26
	2.2344	8.1274							12.295	4.35
	2.2778	8.1703							12.421	4.3
	2.2991	8.131							12.547	4.46
	2.3204	7.4617							12.547	4.79
	2.3417	7.801							12.673	6.08
	2.3629	8.0825							12.673	5.75
	2.37	7.8261							12.799	6.37
									12.799	6.12
									12.924	6.26
									12.924	6.21
									13.05	6.28	6.14923
									13.05	6.13
									13.175	6.54
									13.175	6.25
									13.3	6.67
									13.3	6.12
									13.425	6.17
									13.425	5.85
									13.55	6.29
									13.55	5.92
									13.674	6.29
									13.674	6.02
									13.798	5.41
									14.046	3.95	3.50875
									14.17	3.28
									14.293	3.41
									14.417	3.45
									14.54	3.21
									14.662	3.52
									14.785	3.42
									14.907	3.83
									15.029	3.73	3.44875
									15.272	3.29
									15.393	3.45
									15.514	3.24
									15.635	3.38
									15.755	3.24
									15.875	3.45
									15.995	3.81
									16.114	4.08	3.75
									16.233	3.73
									16.471	3.55
									16.707	3.56
									16.941	3.83
									17.175	4.21	4.2775
									17.407	3.96
									17.637	4.33
									17.867	4.61
									18.095	5	4.802
									18.321	4.88
									18.568	4.67
									18.77	4.67
									18.881	4.79
									19.102	4.89	4.656
									19.212	4.78
									19.432	4.45
									19.649	4.52
									19.866	4.64
									20.08	4.46	4.77429
									20.187	4.73
									20.4	4.52
									20.506	4.37
									20.716	4.9
									20.716	4.97
									20.925	5.47
									21.132	5.02	4.774
									21.338	4.84
									21.543	4.65
									21.746	4.72
									21.947	4.64
									22.148	5	5.222
									22.346	4.78
									22.544	5
									22.74	5.6
									22.935	5.73
									23.128	5.46	4.984
									23.32	5.99
									23.511	4.94
									23.7	4.38
									23.888	4.15
									24.075	4.11	4.455
									24.261	4.64
									24.445	4.32
									24.647	4.33
									24.811	4.64
									24.992	4.69
									25.172	4.5	4.578
									25.351	4.7
									25.529	5.01
									25.706	4.15
									25.882	4.53

## Sheet: Eastern Arabian Sea
	SK117-GC08				CR-2				SS3268G5				SK126-39				MD76-131				EAST			Eastern Arabian Sea	SK117-GC08		CR-2		SS3268G5		SK126-39		MD76-131		EAST		Average	Standard Deviation
	Banakar et al. (2005)				Agnihotri et al. (2008)				Agnihotri et al. (2003)				Kessarkar et al. (2010)				Ganeshram et al. (2000)				Möbius et al. (2011)			Age [kyrs BP]	d15N	d15N-6.77	d15N	d15N-5.77	d15N	d15N-5.77	d15N	d15N-6.29	d15N	d15N-7.02	d15N	d15N-8.31
	Age [kyrs BP]	d15N [promille]	Average d15N		Age [kyrs BP]	d15N [promille]	Average d15N		Age [kyrs BP]	d15N [promille]	Average d15N		Age [kyrs BP]	d15N [promille]	Average d15N		Age [kyrs BP]	d15N [promille]	Average d15N		Age [kyrs BP]	d15N [promille]		-0.2			6.5865	0.8165									0.8165
	0.44	8.2737	8.2737		-0.0337	6.8531	6.5865		0.1022	5.87	6.4275		0	6.81	6.53333		4	7.1	7.625		0.38	9.22		0.5			7.02743	1.25743	6.4275	0.6575	6.53333	0.243333			9.22	0.91	0.767066	0.369861
	1.32	8.5998	8.5998		-0.0215	6.5433			0.2356	6.11			0.4766	6.87			4.89	8.15			1.9	8.89		1.5	8.5998	1.8298			7.184	1.414	6.77	0.48			8.89	0.58	1.07595	0.5665
	2.2	8.462	8.462		-0.0092295	6.3631			0.3689				0.9532	5.92			5.78	7.54			3.8	8.73		2.5	8.462	1.692			6.84667	1.07667	6.735	0.445					1.07122	0.5091
	3.96	7.8665	7.8665		0.0031267	6.7699	7.02743		0.4889	6.73			1.4298	6.77			6.67	8.02			5.7	8.93		3.5	7.8665	1.0965			6.58	0.81	6.335	0.045			8.73	0.42	0.592875	0.397125
	5.72	7.8408	7.8408		0.0156	6.8916			0.5023				2.383	6.22	6.735		7.56	8.09			7.81	8.31		4.5					6.12	0.35	6.705	0.415	7.625	0.605			0.456667	0.108192
	7.48	7.1767	7.1767		0.0281	6.8249			0.6356	7			2.8596	7.25			8.44	7.47			9.395	8.11		5.5	7.8408	1.0708			5.96	0.19			7.54	0.52	8.93	0.62	0.6002	0.314862
	9.24	7.2389	7.2389		0.0408	6.8587			0.769				3.3362	6.68	6.335		9.33				10.98	9.28		6.5					5.52	-0.25			8.02	1			0.375	0.625
	11	6.6314	6.52293		0.0535	6.7284			0.9024				3.8128	5.99			10.22				12.565	8.59		7.5	7.1767	0.4067			5.395	-0.375	6.41	0.12	8.09	1.07	8.31	0	0.24434	0.483078
	11.56	6.5837			0.0663	6.6771			1.0357	7.49	7.184		4.2894	6.69	6.705		11.11	6.62			14.15	7.98		8.5					4.6	-1.17	5.625	-0.665	7.47	0.45			-0.461667	0.67681
	11.84	6.3537			0.0793	6.945			1.1691				4.766	6.72			12	6.87	7.055		15.735	7.87		9.5	7.2389	0.4689			4.73	-1.04					8.11	-0.2	-0.257033	0.617325
	12.12	6.9912	6.49707		0.0923	6.6981			1.3024	6.98			7.15	6.41			12.6	7.24			17.31	7.67		10.5					4.11	-1.66	5.4	-0.89			9.28	0.97	-0.526667	1.104
	12.4	6.1611			0.1054	7.3772			1.4358	6.95			8.0133	5.83	5.625		13.2	7.14	7.115		19.6667	7.52		11.5	6.52293	-0.247067					5.69	-0.6	6.62	-0.4			-0.415689	0.144511
	12.96	6.3389			0.1187	7.5201			1.5691				8.8766	5.42			13.8	7.09			22.0233	7.28		12.5	6.49707	-0.272933					7.06	0.77	7.055	0.035	8.59	0.28	0.203017	0.381495
	13.24	6.1385	6.19903		0.132	7.3063			1.7025	7.25			10.3285	5.4			14.4	7.31			24.38	7.95		13.5	6.19903	-0.570967					4.79	-1.5	7.115	0.095			-0.658656	0.654102
	13.52	6.2793			0.1454	7.5395			1.8359	7.25			11.5054	5.69			15	7.84	6.895		26.7367	7.39		14.5	6.362	-0.408							7.31	0.29	7.98	-0.33	-0.149333	0.312283
	13.8	6.1793			0.1589	7.4389			1.9692				12.6823	7.06			15.6	5.95						15.5	6.6703	-0.0997					7.14	0.85	6.895	-0.125	7.87	-0.44	0.046325	0.482981
	14.36	6.3537	6.362		0.1725	7.2658			2.1026		6.84667		13.8592	4.79			16.2	5.83	5.905					16.5	6.486	-0.284							5.905	-1.115			-0.6995	0.4155
	14.92	6.3703			0.1862	6.9344			2.2359	7.63			15.0361	7.14			16.8	5.98						17.5	6.26435	-0.50565					7.34	1.05	6.01	-1.01	7.67	-0.64	-0.276412	0.787761
	15.48	6.6703	6.6703		0.2	7.4427			2.3693				17.39	7.34			17.4	6.01						18.5	6.31585	-0.45415							7.07667	0.0566667			-0.198742	0.255408
	16.04	6.436	6.486		0.2139	6.9823			2.5027	5.59			20.202	6.29			18	6.29	7.07667					19.5	6.0537	-0.7163							6.85667	-0.163333	7.52	-0.79	-0.556544	0.279665
	16.6	6.536			0.2279	6.9565			2.636				22.571	5.86			18.35	8.27						20.5	6.415	-0.355					6.29	0	6.90667	-0.113333			-0.156111	0.148051
	17.16	6.2314	6.26435		0.242	6.2543			2.7694				25.713	5.92			18.71	6.67						21.5	6.2092	-0.5608							6.95333	-0.0666667			-0.313733	0.247067
	17.72	6.2973			0.2561	6.0535			2.9027	7.32							19.06	6.95	6.85667					22.5	6.17865	-0.59135					5.86	-0.43	6.54667	-0.473333	7.28	-1.03	-0.631171	0.237715
	18	6.2614	6.31585		0.2704	6.2477			3.0361		6.58						19.41	7.21						23.5	6.0898	-0.6802							6.995	-0.025			-0.3526	0.3276
	18.4	6.3703			0.2848	7.0365			3.3028								19.76	6.41						24.5	6.4255	-0.3445							6.82	-0.2	7.95	-0.36	-0.3015	0.0720498
	19.2	6.0537	6.0537		0.2993	7.2824			3.4362	6.4							20.12	6.75	6.90667					25.5	6.387	-0.383					5.92	-0.37	6.53	-0.49			-0.414333	0.053767
	20	6.4055	6.415		0.3138	7.7619			3.5695								20.47	7.35						26.5
	20.8	6.4245			0.3285	7.165			3.8362								20.82	6.62
	21.6	6.2092	6.2092		0.3432	7.3523			3.9696	6.76							21.18	7.21	6.95333					Average	6.77434				5.77029		6.28771		7.017		8.30929
	22.4	6.187	6.17865		0.3581	7.2545			4.103		6.12						21.53	7.59
	22.8	6.1703			0.373	7.3506			4.3697	6.38							21.88	6.06
	23.2	6.0898	6.0898		0.3881	7.2163			4.6364	6.19							22.24	6.47	6.54667
	24	6.4255	6.4255		0.4032	6.9401			4.9031	5.79							22.59	6.51
	25.06	6.387	6.387		0.4185	7.2265			5.1698		5.96						22.94	6.66
					0.4338	7.0644			5.4365								23.29	6.59	6.995
					0.4492	7.003			5.5699	5.85							23.65	7.4
					0.4647	7.5754			5.7033								24	6.82
					0.4804	7.2494			5.97	6.07							25.06	6.53
					0.4961	7.6492			6.2367	6.6	5.52						26.12	6.94
					0.5119	7.2446			6.37	5.49
					0.5278	7.3624			6.5034	4.47
					0.5438	6.9447			6.7701	5
					0.5599	6.7911			7.0368		5.395
					0.5761	6.7368			7.3036
					0.5924	7.0471			7.4369	5.44
					0.6088	6.654			7.5703
					0.6253	6.74			7.7036	5.35
					0.6418	6.5467			7.837
					0.6585	6.6415			8.1037	4.6	4.6
					0.6753	6.74			8.2371	4.49
									8.3704
									8.6371
									8.7705	4.71
									8.9038
									9.1706	4.49	4.73
									9.4373	4.95
									9.704	4.75
									9.9707
									10.1041	4.11	4.11
									10.2374
									10.3708	4.11
