# Supplementary material for: Glacial–interglacial changes and Holocene variations in Arabian Sea denitrification
Source: Copernicus journal article supplement (doi:10.5194/bg-15-507-2018), 2018-01-26
Supplement: Supplementary file 2 [file Supplement Table S2_SST Averages.xlsx]

## Sheet: Northern AS
SO 130-275 KL	SST			SO90-136 KL				SO90-93KL					SO90-93KL	SO90-136 KL	275KL	Average	Standard Deviation
Böll et al. (2014)				Schulte and Müller (2001)				Böll et al. (2015)				Age [years BP]	SST	SST	SST	SST
Age [years BP]	SST	SST		Age [years BP]	SST	SST		Age [years BP]	SST	SST		-0.2			27.6005	27.6005
-0.0345	27.5754	27.6148		2.0633	27.7879	27.7879		1	27.2424	27.4647		0.5			27.5736	27.5736
-0.0285	27.538			2.0844	27.7879			1.37	27.5758			1.5	27.4647		27.832	27.6483	0.183672
-0.022	27.572			2.9283	27.7879			1.75	27.5758			2.5	27.495	27.7879	28.1414	27.8081	0.264291
-0.015	27.6061			3.7722	27.7879			2.13	27.5758	27.495		3.5	27.7273	27.7879		27.7576	0.0303
-0.0075	27.7108			5.0802	27.4848			2.5	27.6061			4.5	27.2626			27.2626
0	27.6866	27.5736		6.2616	27.4848			2.88	27.303			5.5	27.5253	27.4848		27.505	0.0202333
0.006	27.553			7.4852	27.4848			3.25	27.697	27.7273		6.5	27.5	27.4848		27.4924	0.0076
0.0125	27.484			9.0675	26.8788			3.63	27.7576			7.5	27.8081	27.4848		27.6464	0.16165
0.0195	27.4684			10.0019	26.8788			4	27.1818	27.2626		8.5	27.5252			27.5252
0.026	27.5368			11.2746	26.5758	26.2728		4.38	27.1818			9.5	26.7475	26.8788		26.8131	0.0656667
0.033	27.5882			11.6771	25.9697			4.75	27.4242			10.5	26.4394	26.8788		26.6591	0.2197
0.039	27.685			12.6153	25.6667	25.9697		5.13	27.2424	27.5253		11.5	26.101	26.2728		26.1869	0.085875
0.044	27.7093			12.8403	25.9697			5.5	27.697			12.5	25.5	25.9697		25.7349	0.23485
0.0505	27.6194			12.8778	26.2727			5.87	27.6364			13.5	25.1818	26.1212		25.6515	0.469688
0.056	27.4648			13.5715	26.2727	26.1212		6.25	27.3939	27.5		14.5	25.0061	25.8182		25.4121	0.406045
0.0797	27.3939			13.8763	25.9697			6.62	27.6061			15.5	24.2597	24.7576		24.5087	0.248929
0.1082	27.3838			14.1506	25.3636	25.8182		7	27.697	27.8081		16.5	23.6414	23.4809		23.5611	0.0802896
0.1159	27.264			14.4858	26.2727			7.38	27.6667			17.5	23.3203	24		23.6601	0.339863
0.1388	27.153			15.6992	24.7576			7.75	28.0606			18.5	23.5128			23.5128
0.1695	27.1934			16.0192	24.7576	24.4545		8.13	27.4848	27.5252		19.5	23.5629	24.1515		23.8572	0.294283
0.1966	27.3234			16.3248	24.1515			8.5	27.6667			20.5	23.623	24.1515		23.8872	0.26425
0.2073	27.5152			16.765	24.1515			8.88	27.4242			21.5	24.384			24.384
0.2338	27.4242			17.2051	24.1515	24		9.25	27.0909	26.7475		22.5	25.4317	24.7576		25.0947	0.33705
0.2689	27.3552			17.7	23.8485			9.62	26.9394			23.5	25.1226	24.7576		24.9401	0.1825
0.2689	27.335			17.9	24.1515			9.99	26.2121			24.5	23.9494	24.1515		24.0505	0.101025
0.2998	27.3219			19.6571	24.1515			10.36	26.6061	26.4394		25.5	25.1145			25.1145
0.3152	27.5424			20.5725	24.1515	24.1515		10.72	26.2727			26.5
0.3306	27.5323			20.9157	24.1515			11.09	26.303	26.101
0.3599	27.6162			22.5175	24.7576			11.45	26.2121
0.3668	27.5455			23.958	24.7576			11.93	25.7879
0.3883	27.6061			24.6578	24.1515			12.31	26.0909	25.5
0.4182	27.5623							12.68	25.3333
0.4445	27.4082							12.8	25.6667
0.4483	27.4385							12.95	24.9091
0.4797	27.5428							13.21	24.7576	25.1818
0.4968	27.6768							13.47	25.2727
0.5487	27.5859							13.73	25.6667
0.5488	27.5354							13.98	25.0303
0.5864	27.4747							14.24	25.3636	25.0061
0.6137	27.6162							14.5	25.1212
0.6439	27.6768							14.65	25.6364
0.676	27.7576							14.8	24.3636
0.7113	27.8586							14.95	24.5455
0.746	28.0101							15.1	24.4242	24.2597
0.7788	28.2121							15.25	24.4545
0.8103	28.1414							15.41	24.7273
0.8357	28.0303							15.56	24.7273
0.8833	27.8283							15.71	24.3333
0.9101	27.5859							15.86	23.5758
0.9369	27.4646							15.86	23.5758
0.9607	27.596							16.01	23.6061	23.6414
0.9846	27.6566							16.17	24.1212
1.0114	27.6768	27.832						16.36	23.6061
1.0296	27.5859							16.55	23.4242
1.0368	27.4747							16.73	23.5758
1.0694	27.4545							16.92	23.5152
1.093	27.4141							17.1	23.3939	23.3203
1.1769	27.5859							17.29	23.4848
1.2031	27.5657							17.47	23.1635
1.2296	27.7576							17.66	23.2389
1.2577	27.697							18.03	23.3027	23.5128
1.2842	27.7374							18.4	23.5377
1.3151	27.4949							18.77	23.6979
1.3322	27.6061							19.14	23.5286	23.5629
1.3632	27.6768							19.51	23.5152
1.4036	27.8283							19.89	23.645
1.4334	27.6566							20.26	23.514	23.623
1.4646	27.5556							20.63	23.732
1.4795	27.5152							21	23.9236	24.384
1.4915	27.6263							21.37	24.5561
1.5124	27.7475							21.74	24.6724
1.534	27.798							22.11	26.0628	25.4317
1.5534	27.8687							22.48	25.1215
1.5721	27.7778							22.85	25.1108
1.5947	27.7172							23.23	26.387	25.1226
1.6172	27.7273							23.53	23.9618
1.6344	27.7273							23.82	25.019
1.6644	27.9596							24.17	23.332	23.9494
1.6826	28.0909							24.61	24.5669
1.6999	28.3434							25.02	24.8215	25.1145
1.7155	28.101							25.42	25.4075
1.7359	28.0808
1.7581	28.0808
1.779	28.2929
1.7978	28.2525
1.8169	28.2323
1.866	28.202
1.8959	28.202
1.9259	28.2424
1.9839	28.2626
2.0182	28.3131	28.1414
2.0568	28.101
2.0847	28.101
2.1162	28
2.1454	28.101
2.1668	27.8788
2.1945	28.0303
2.2528	28.1717
2.3062	28.3636
2.3097	28.3535

## Sheet: Oman Upwelling
M74-SL 163/MC 681					MD00-2354						SL 163	MD00-2354	Average	Standard Deviation
this study					Böll et al. 2015					ka BP	SST [°C]	SST [°C]	SST [°C]
Age [kyrs BP]	SST [°C]	SST [°C]			Age [kyrs BP]	SST [°C]	SST [°C]			0.5	26.25		26.25
0.1568	26.4	26.25			1.27	25.7576	25.8182			1.5	26.2	25.8182	26.0091	0.1909
0.5309	26				1.54	25.697				2.5	26.65	25.5303	26.0902	0.55985
0.7798	25.55				1.82	26				3.5		25.4667	25.4667
0.9459	27.05				2.09	25.5455	25.5303			4.5		25.1717	25.1717	0
1.089	25.3	26.2			2.36	25.6667				5.5	25.1854	25.4667	25.326	0.140659
1.5383	26.25				2.63	25.4848				6.5	25.8464	25.1667	25.5065	0.33987
1.6503	26.15				2.9	25.4242				7.5	26.0955	25.6515	25.8735	0.221977
1.7623	26				3.18	25.4242	25.4667			8.5	26.925	25.0424	25.9837	0.94129
1.8743	27.3				3.45	25.5455				9.5		24.9576	24.9576
1.9863	26.2				3.72	25.5758				10.5		25.2155	25.2155
2.0983	26.35	26.65			3.72	25.5455				11.5		25.3737	25.3737
2.2103	27.75				3.99	25.2424				12.5		25.6546	25.6546
2.3223	26.55				4.26	25.1515	25.1717			13.5		25.8398	25.8398
2.4343	26.7				4.53	25.1212				14.5		25.3636	25.3636
2.5463	25.9				4.81	25.2424				15.5		23.5825	23.5825
5.7523	26	25.1854			5.08	25.0909	25.4667			16.5		23.0939	23.0939
5.7648	25				5.35	25.303				17.5		22.9495	22.9495
5.7773	25.65				5.62	25.1212				18.5		23.5334	23.5334
5.79	25.25				5.62	25.1818				19.5		23.5515	23.5515
5.8023	25.0658				5.89	25.2424				20.5		23.4303	23.4303
5.8148	25.7				6.17	25.2424	25.1667			21.5		23.5606	23.5606
5.8273	25.95				6.44	25.1818				22.5		23.2424	23.2424
5.8398	25.55				6.71	25.2121				23.5		24.1465	24.1465
5.8648	25				6.98	25.0303				24.5		24.0273	24.0273
5.8773	25				7.25	26.1818	25.6515			25.5
5.8898	23.85				7.25	26.2121				26.5
5.9023	25.45				7.52	25
5.9273	25.95				7.8	25.2121
5.9398	24.5				8.07	25.1515	25.0424
5.9648	24.25				8.07	25.2121
5.9897	24.8				8.34	25.2121
6.0022	25.25	25.8464			8.61	25.0606
6.0147	25.5				8.88	24.5758
6.0272	26.05				9.16	24.9697	24.9576
6.04	26.15				9.43	24.2424
6.0522	26.35				9.7	24.7576
6.0647	25.45				9.82	25.4848
6.0789	25.4				9.95	25.3333
6.0948	26				10.08	25.4242	25.2155
6.111	25.1				10.2	25
6.1275	26.15				10.32	25.6667
6.1491	25.55				10.45	25.3636
6.1706	25.9				10.57	24.8788
6.185	25.7				10.7	25.0909
6.2173	25.6				10.82	24.9091
6.2388	24.6246				10.95	25.2727
6.2604	24.3971				10.95	25.3333
6.2819	24.4284				11.08	25.9394	25.3737
6.303	25.25				11.2	26
6.3465	25.7465				11.33	25.0909
6.3681	25.8891				11.45	25.0606
6.3896	25.7				11.64	25.1818
6.411	25.2128				11.83	24.9697
6.4324	25.4429				12.02	25.6364	25.6546
6.4536	25.65				12.22	25.4242
6.4748	25.1706				12.41	25.2121
6.4945	25.8				12.6	25.7576
6.513	25.55				12.6	25.8182
6.5322	25.35				12.66	25.697
6.5511	25.0395				12.72	25.5152
6.57	26.1945				12.78	26.1212
6.5889	25.8097				12.84	25.5152
6.608	25.75				12.9	25.8485
6.6266	25.35				13.08	25.8182	25.8398
6.6455	26.65				13.26	25.8182
6.6644	26.3				13.43	25.6061
6.6833	25.1				13.61	25.8788
6.702	25.65				13.79	25.8485
6.721	25.7				13.79	25.7576
6.7399	26.4903				13.97	26.1515
6.7588	26.2				14.14	25.9091	25.3636
6.7777	26.5163				14.32	25.6364
6.797	26.15				14.5	25.3939
6.8155	26.3				14.62	25.3939
6.8343	25.95				14.75	25.2727
6.8501	26.2				14.87	25.303
6.8658	27.85				14.99	24.6364
6.8847	27.15				15.12	24.8485	23.5825
6.9036	26.9				15.24	23.7273
6.922	27.2				15.24	23.5455
6.9413	26.1				15.36	23.697
6.9602	26.35				15.48	23.303
6.9791	26.75				15.61	23.2121
7.0006	26.05	26.0955			15.73	23.3636
7.023	26.1				15.85	23.2121
7.0461	26.35				15.98	23.3333
7.0697	26.15				16.1	23.7576	23.0939
7.0948	25.9				16.19	23.3939
7.145	25.45				16.28	22.7576
7.1676	25.55				16.37	23
7.1901	26.7				16.47	23.2424
7.2127	26.55				16.56	22.9091
7.2352	25.85				16.65	22.7273
7.258	26.4				16.74	22.9394
7.2804	25.9				16.83	23.2727
7.3029	25.5				16.93	22.9394
7.3255	26.4				17.02	23.2121	22.9495
7.348	26.25				17.11	22.9394
7.371	26.1				17.2	22.8485
7.3942	26.4				17.42	22.8788
7.4179	25.5				17.64	23.0303
7.4415	25.75				17.85	22.7879
7.4652	26.3				18.07	23.1212	23.5334
7.489	25.95				18.29	23.5455
7.5128	26.6				18.51	23.697
7.5372	26.9				18.72	23.7273
7.5629	26.05				18.94	23.5758
7.5886	26.3				19.16	23.4848	23.5515
7.634	25.8				19.16	23.4848
7.6819	26.1				19.38	23.4848
7.7299	26.4				19.6	23.5758
7.778	25.85				19.81	23.7273
7.8258	26.25				20.03	23.4242	23.4303
7.8738	26.1				20.25	23.5152
7.9218	25.95				20.47	23.3333
7.9697	25.75				20.69	23.3939
8.018	27.1	26.925			20.9	23.4848
8.0656	26.75				21.12	23.697	23.5606
					21.34	23.6061
					21.34	23.6667
					21.56	23.4545
					21.77	23.5455
					21.99	23.3939
					22.21	23.4545	23.2424
					22.43	23.0606
					22.65	23.2727
					22.86	23.1818
					23.08	23.5455	24.1465
					23.3	23.3939
					23.32	23.3636
					23.35	23.4545
					23.37	23.3636
					23.39	23.5152
					23.41	23.5758
					23.44	23.8182
					23.46	23.5455
					23.48	23.9394
					23.5	23.6061
					23.53	24.1818
					23.55	24.2424
					23.57	23.9394
					23.59	24.1818
					23.62	24.303
					23.64	24.2424
					23.66	24.4848
					23.68	24.6364
					23.71	24.0909
					23.73	24.7273
					23.73	24.8485
					23.75	24.7576
					23.77	24.9394
					23.8	24.5152
					23.8	24.697
					23.82	24.7879
					23.84	24.9697
					23.86	24.8182
					23.89	24.5758
					23.91	24.5455
					23.93	23.9091
					23.95	24.4848
					23.98	23.9394
					23.98	24
					23.98	23.3333
					24	23.4242	24.0273
					24.12	23.7576
					24.23	23.6667
					24.35	23.697
					24.47	23.5758
					24.58	24.2424
					24.7	24.5455
					24.8	24.303
					24.9	24.4848
					24.9	24.5758

## Sheet: Western AS open ocean
SO42-74KL				MC2-GOA4				MD85674				P178-15P						MD85668				RC27-42						SO42-KL74	MC2-GOA4	MD85674	P178-15P Mg/Ca	MD85668	RC27-42	Average	Standard Deviation
Huguet et al. (2006)				Isaji et al. (2015)				Bard et al. (1997)				Tierney et al. (2016)						Rostek et al. (1997)				Pourmand et al. (2007)					Age [kyrs BP]	SST [°C]	SST [°C]	SST [°C]	SST [°C]	SST [°C]	SST [°C]	SST [°C]
Age [kyrs BP]	SST [°C]	SST [°C]		Age [kyrs BP]	SST [°C]	SST [°C]		Age [kyrs BP]	SST [°C]	SST [°C]		Age [kyrs BP]	SST [°C] Alkenone	SST [°C] Tex86	SST [°C] Mg/Ca	SST°C Alenones		Age [kyrs BP]	SST [°C]	SST [°C]		Age [ka BP]	SST [°C]	SST [°C]			-0.018				29.1			29.1
0.2	27.3	27.3225		0.4014	26.8354	26.88		0	26.9	26.775		-0.018	29.1	22.5	27.8	29.1		0	26.7			4.97541	27.0688				0.5	27.3225	26.88	26.775	28.4111	26.7		27.2177	0.634547
0.4	27.36			0.8028	26.9246			0.3	26.6			0.045			27.4			0.8	26.7			6.96233	24.4993				1.5	27.102	27.1465		28.6			27.6162	0.695924
0.6	27.27			1.2042	26.9736	27.1465		0.5	26.6			0.058	28.3	22		28.4111		2.2	26.5			7.62464	27.3895				2.5	27.018	27.0834	26.75	28.3	26.5		27.1303	0.62047
0.82	27.36			1.6056	27.3193			0.8	27			0.12	28.2	22.1	26.7			3.7	26.3			8.28695	26.769				3.5	26.925	26.7542	27.5	28.05	26.3	27.0688	27.0997	0.555824
1.03	27.12	27.102		2.007	27.0781	27.0834		2	26.9	26.75		0.2035			27.6			5.2	26.1			10.2739	24.9548	25.7401			4.5	27.07	26.7482	27.1	28.0286			27.2367	0.477529
1.25	27.21			2.4084	27.2487			2.9	26.6			0.262	28.3	21.9				7.3	26.4			10.9362	26.5255				5.5	27.22		27.3	28.2667	26.1	24.4993	26.6772	1.28727
1.46	27.03			2.8098	26.9235			3.8	27.5			0.2885			27.8			9.3	25.7			11.5985	26.9023				6.5	26.955		26.8	28.1		27.3895	27.3111	0.504119
1.68	27.12			3.2112	26.9885	26.7542		4.7	27.1			0.3415			27.6			11.3	25.6			13.5854	25.8362	24.6045			7.5	26.94		26.6	27.35	26.4	26.769	26.8118	0.323224
1.89	27.03			3.6127	26.52			5.5	27.3			0.389	28.3	22.3	27.7			13.4	26			13.8004	23.3728				8.5	26.8725			27.7			27.2862	0.41375
2.1	26.91	27.018		4.0141	26.8059	26.7482		6.5	26.8			0.4745			27.4			15.2	25.9			15.1906	25.1111				9.5	26.76		27	27.6667	25.7	25.7401	26.5734	0.75752
2.32	26.82			4.4155	26.6916			7.7	26.6			0.539	28.5	22.3	27.2			16.8	26.2			16.12	25.5434				10.5	26.66		26.6	27.575		26.9023	26.9343	0.386819
2.53	27.15			4.8169	26.7472			9.4	27			0.634	28.3	22	27.6			18	25.5	25.55		17.514	24.5888				11.5	26.415			27.24	25.6		26.4183	0.669531
2.75	27.03			15.3275	25.8023			10.9	26.6			0.69			28			18.7	25.6			18.1077	23.6475	21.7566			12.5	26.165		26.4	27		24.6045	26.0424	0.884216
2.96	27.18			17.736	24.6			12.8	26.4			0.737	28.7	21.9				19.2	25.1	25.35		18.2383	23.0565				13.5	26.2625		26.5	26.9667	26		26.4323	0.355614
3.31	26.97	26.925		20.5726	24.9212			13.8	26.5			0.771	28.5	22.1	28.6			19.7	25.6			18.3688	21.5781				14.5	25.91		26.5	26.8333		25.1111	26.0886	0.654088
3.65	26.88			22.9988	25.1533			14.9	26.5			0.89	28.6	22.2	28.4			20.2	25.5	25.4		18.4341	21.4559				15.5	25.41	25.8023		26.7	25.9	25.5434	25.8711	0.450026
4	26.97	27.07		26.0888	25.1361			16	26.5	26.25		1.08			28.1	28.6		20.8	25.3			18.63	20.7388				16.5	25.17		26.25	26.3	26.2	24.5888	25.7018	0.696876
4.34	27.03							16.8	26			1.151	28.7	22.3	27.5			21.3	26.2			18.6953	20.8105				17.5	24.91	24.6	25.7	25.7		21.7566	24.5333	1.45455
4.69	27.21							17.3	25.7	25.7		1.854	28.5	22.3	28.2			22.1	26.6			18.7605	21.0963				18.5	25.045		25.55	25.25	25.55	24.0534	25.0897	0.552349
5.04	27.09	27.22						17.7	25.7			2.274	28.3	22.6	27.3	28.3		24.6	26.5			18.8911	21.6696				19.5	25.07		25.55	25.8	25.35	23.5545	25.0649	0.792265
5.38	27.33							18.1	25.7	25.55		2.73	28.3	22.5	27.6			27.2	26.4			19.0217	23.0014	24.0534			20.5	24.985	24.9212	25.4		25.4	23.4061	24.8225	0.736124
5.73	27.24							18.6	25.4			3.183	27.8	22.6	28.2	28.05						19.2175	24.7121				21.5	25.09		26.1	25.7	26.2		25.7725	0.436198
6.12	27.21	26.955						19.2	25.5	25.55		3.331	28.2	22.4	28.4							19.3481	24.267				22.5	25.195	25.1533	26.1		26.6	24.1014	25.4299	0.861938
6.92	26.7							19.7	25.6			3.527	28	21.7	28.4							19.544	22.9046				23.5
7.31	27.06	26.94						20.2	25.6	25.4		3.574	28.3	21.8	28.5							19.6745	23.7259				24.5			26.5	25.5	26.5	24.3187	25.7047	0.898321
7.71	26.82							20.7	25.2			3.795	28	22.4								19.8704	25.7091				25.5				25.9			25.9	0
8.11	26.91	26.8725						21.2	25.9	26.1		3.914	28	22.5	27.8							20.0039	23.5545				26.5		25.1361	26.5	25.7			25.7787	0.559584
8.37	26.97							21.7	26.3			4.032	28	22.4	27.5	28.0286						21.1057	23.4061
8.63	26.97							22.6	26.1			4.14	28.1	22.2	27.9							23.3095	24.1014
8.88	26.64							24.5	26.5			4.393	28.1	22.4	27.9							25.5132	24.3187
9.14	26.91	26.76						26.1	26.5			4.643	28	22.6	28.2							27.3919	23.4176
9.47	26.7											4.732	27.9	22.6	27.9							28.1839	24.892
9.8	26.67											4.822	27.8	22.4	28.1
10.14	26.7	26.66										4.912	28.3	22.7	28.1
10.47	26.58											5.004	28.1	22.7	27.4	28.2667
10.8	26.7											5.096	28.3	22.9	27.6
11.13	26.42	26.415										5.325	28.2	22.4	27.6
11.46	26.55											5.546	28.1	22.9	28.1
11.69	26.36											5.724	28.5	22.5	28.2
11.92	26.33											5.913	28.4	22.6	28
12.15	26.21	26.165										6.065	27.7	22.3	28.7	28.1
12.38	26.15											6.217	28.3	22.3	28.3
12.61	26.18											6.294	28.3	22.7
12.84	26.12											6.674	28.1	23	28.2
13.08	26.21	26.2625										7.051	27.6	23.1	27.8	27.35
13.36	26.39											7.734	27.1	22.3	28.1
13.65	26.15											8.441	27.5	21.9	27.7	27.7
13.94	26.3											9.146	27.9	22.3	28	27.6667
14.23	26.15	25.91										9.566	27.6	21.9	28
14.52	25.73											9.831	27.5	21.8	27.8
14.8	25.85											10.003	27.5	22.4	27.6	27.575
15.13	25.64	25.41										10.134	27.6	22.2	27.9
15.35	25.55											10.266	27.7	22.3	27.5
15.63	25.21											10.687	27.5	22	26.8
15.9	25.24											11.05	27.5	21.8	27.2	27.24
16.18	25.24	25.17										11.419	27.4	21.9
16.54	25.12											11.568	27.2	22	26.3
16.89	25.15											11.717	27.1	22.7	25.9
17.25	24.97	24.91										11.865	27	22.8	25.1
17.61	24.91											12.014	27.1	22.3	25.8	27
17.96	24.85											12.161	27	23	24.7
18.32	24.94	25.045										12.532	27	22.2	25.1
18.68	25											12.883	26.9	20.4	26.5
18.79	25.06											13.203	27	20	26.5	26.9667
18.91	25.18											13.535	27	19.7	26.5
19.04	25.21	25.07										13.863	26.9	20	24.8
19.16	25.06											14.165	26.9	20.5	25	26.8333
19.29	25.03											14.564	26.8	20.4	25.5
19.42	25.12											14.985	26.8	21.4	25.6
19.55	25.06											15.407	26.9	22.3	25.3	26.7
19.68	24.94											15.825	26.5	21.9	26.6
20.29	25.12	24.985										16.187	26.5	23.4		26.3
20.9	24.85											16.979	26.1	21.8	24.3
21.5	25.09	25.09										17.767	25.7	19.6		25.7
22.11	25.15	25.195										18.134	25.4	18.5	24.2	25.25
22.72	25.24											18.509	25.1	17.7	25.3
												19.241	25.8	18.7	26.2
												21.911	25.7	19.1	24.8
												24.548	25.5	18.9	25.7
												25.535	25.9	19.1	25.1
												26.504	25.7	18.4
												27.009	25.3	17.8	25.4

## Sheet: Somali Upwelling
NIOP-905P				TY93-929					NIOP-905P	TY93-929	Average	Standard Deviation
Huguet et al. (2006)				Rostek et al. (1997)
Age [kyrs BP]	SST [°C]	SST [°C]		Age [kyrs BP]	SST [°C]			Age [kyrs BP]	SST [°C]	SST [°C]	SST [°C]
0.0188875	26.3	26.374		2.3	25.9			0.5	26.374		26.374
0.207762	26.33			4.3	26.2			1.5	26.28		26.28
0.396637	26.33			5.2	26.1			2.5	25.89	25.9	25.895	0.005
0.585512	26.49			6.2	25.7			3.5	25.985		25.985
0.782425	26.42			7.2	26.3			4.5	25.72	26.2	25.96	0.24
1.05167	26.55	26.28		8.2	26			5.5	25.812	26.1	25.956	0.144
1.32092	26.14			9.1	24.8			6.5	25.9129	25.7	25.8064	0.106429
1.59017	26.16			10.1	25.3			7.5	25.81	26.3	26.055	0.245
1.85723	26.27			11.1	26.2			8.5	25.9344	26	25.9672	0.0327778
2.10454	25.97	25.89		12.1	25.8			9.5	25.945	24.8	25.3725	0.5725
2.35186	25.88			12.8	26.5			10.5	25.58	25.3	25.44	0.14
2.59917	25.97			13.5	26.1			11.5	26.098	26.2	26.149	0.051
2.84648	25.74			14.2	24.9			12.5	25.925	26.15	26.0375	0.1125
3.09379	26.35	25.985		15	25.3			13.5	25.755	26.1	25.9275	0.1725
3.34111	25.99			15.7	24.4			14.5	25.815	24.9	25.3575	0.4575
3.58842	25.96			16.4	24.5			15.5	25.8967	24.85	25.3733	0.523333
3.83314	25.64			17.1	24.2			16.5	25.7486	24.5	25.1243	0.624286
4.05458	25.51	25.72		17.9	24.4			17.5	25.6125	24.3	24.9562	0.65625
4.27602	25.69			18.3	24.8			18.5	25.4325	24.4	24.9162	0.51625
4.49746	25.75			18.7	24			19.5	25.3075	24.75	25.0287	0.27875
4.71889	25.73			19.2	25			20.5	25.39	24.65	25.02	0.37
4.94033	25.92			19.6	24.5			21.5	25.4625	24.6333	25.0479	0.414583
5.16177	25.84	25.812		20.1	24.8			22.5	25.5425	24.45	24.9962	0.54625
5.38321	26.03			20.5	24.5			23.5		25.5	25.5
5.59706	25.59			21	25			24.5		25.6	25.6
5.74261	25.9			21.4	24.9			25.5		25.2	25.2
5.88817	25.7			21.8	24			26.5
6.03372	25.92	25.9129		22.3	24.7
6.17928	25.68			22.7	24.2
6.32483	26.05			23.2	25.3
6.47039	26.06			23.4	25.6
6.61594	26.11			23.6	25.1
6.7615	25.81			23.9	26
6.90706	25.76			24.1	25.6
7.05784	26.08	25.81		25.5	25.2
7.21143	25.74			26.9	25.9
7.36502	25.78
7.50887	25.61
7.64081	26.01
7.77275	25.91
7.90297	25.54
8.0177	25.49	25.9344
8.13243	25.8
8.24715	26.08
8.36188	25.94
8.4766	26.02
8.59133	26.19
8.70606	25.82
8.82078	25.85
8.93551	26.22
9.05295	26.16	25.945
9.22191	25.64
9.39087	26
9.55984	25.92
9.7288	26.02
9.89777	25.93
10.0667	25.71	25.58
10.2357	25.62
10.4047	25.59
10.5717	25.42
10.7383	25.56
10.905	25.58
11.0717	25.98	26.098
11.2074	26.11
11.3094	26.06
11.6231	26.11
11.9369	26.23
12.2506	25.99	25.925
12.5513	26
12.7342	25.85
12.917	25.86
13.0999	25.82	25.755
13.3043	25.71
13.5911	25.77
13.8583	25.72
14.1254	25.73	25.815
14.6506	25.9
15.2212	25.87	25.8967
15.7919	26.13
15.9364	25.69
16.0205	25.93	25.7486
16.0879	25.74
16.201	25.9
16.346	25.58
16.491	25.85
16.636	25.6
16.781	25.64
17.0051	25.67	25.6125
17.263	25.66
17.5209	25.53
17.7789	25.59
18.0368	25.87	25.4325
18.2947	25.15
18.5527	25.55
18.8106	25.16
19.0685	25.45	25.3075
19.3265	25.03
19.5844	25.43
19.8423	25.32
20.1003	25.42	25.39
20.3582	25.35
20.6161	25.55
20.8741	25.24
21.132	25.58	25.4625
21.3899	25.41
21.6479	25.77
21.9058	25.09
22.1638	25.49	25.5425
22.4217	25.39
22.6796	25.77
22.9376	25.52

## Sheet: Eastern AS
SN-06				AAS9-21				SK237-CG04					SK 129-CR04					SK157-4				SK117-GC08				MD90963			Eastern Arabian Sea		SN-06	AAS9-21	SK237-CG04	Average	Standard Deviation						Southastern Arabian Sea
Tiwari et al. (2015)				Govil and Naidu (2010)				Saraswat et al. (2013)					Mahesh and Banakar (2014)					Saraswat et al. (2005)				Banakar et al. (2010)				Rostek et al. (1997)
Age [kyrs BP]	SST [°C]	SST [°C]		Age [kyrs BP]	SST [°C]	SST [°C]		Age [kyrs BP]	SST [°C]	SST [°C]			Age [kyrs BP]	SST [°C]	SST [°C]			Age [kyrs BP]	SST [°C]	SST [°C]		Age [kyrs BP]	SST [°C]	SST [°C]		Age [kyrs BP]	SST [°C]			Age [kyrs BP]	SST [°C]	SST [°C]	SST [°C]	SST [°C]									SK 129-CR04	SK157-4	MD90963	Average	Standard Devition
0.1542	29.44	28.4415		0.51	29.04			0.12	28.18	28.2812			1.89	28.6				5.4344	28.0977	28.0883		2.26	29.1			0	28			0.5	28.4415	29.04	28.2812	28.5876	0.326522							Age [kyrs BP]	SST [°C]	SST [°C]	SST [°C]	SST [°C]
0.216	28.62			1.07	28.98	28.71		0.29	28.08				2.19	28.9				5.7733	28.0788			4.72	29			13.9	27.6			1.5	29.075	28.71	28.4173	28.7341	0.269056							0.5			28	28
0.2778	29.41			1.81	28.44			0.51	28.76				3.54	28.5				6.1122	28.4854	28.0587		5.54	28.6			16	26.7			2.5	28.5	28.63	28.1657	28.4319	0.195564							1.5	28.6			28.6
0.3396	27.68			2.55	28.73	28.63		0.6	27.65				4.75	28.4				6.79	27.6319			6.36	28.4			18	27			3.5	28.536	27.24	28.325	28.0337	0.567779							2.5	28.9			28.9
0.4014	28.22			2.92	28.53			0.68	28.64				5.96	28.9				7.1289	28.431	28.6626		7.18	28.6			20	26.9			4.5	28.2575	27.06	28.38	27.8992	0.595484							3.5	28.5			28.5
0.4632	28.24			3.67	27.24			0.77	29.24				8.12	28.4				7.8067	28.8943			8	27.9			22.1	25.5			5.5		27.815	28.73	28.2725	0.4575							4.5	28.4			28.4
0.5249	27.71			4.41	27.06			0.86	27.89				11.39	28.7				8.4844	28.1527			8.98	28.1			24.1	26.2			6.5			28.5967	28.5967								5.5	28.9	28.0883		28.4941	0.405875
0.5867	28.88			5.15	28.05	27.815		0.95	27.81				14	28.7				9.1622	28.4141	28.488		9.95	28.4			26.1	26.8			7.5		28.07	28.8	28.435	0.365							6.5		28.0587		28.0587
0.6485	27.92			5.89	27.58			1.03	27.93	28.4173			15.61	29.2				9.84	28.5619			10.93	28.7							8.5		28.18	28.76	28.47	0.29							7.5		28.6626		28.6626
0.7103	29.06			7.38	28.07	28.07		1.12	28.55				16.57	28.7	28.5			10.32	28.5919	28.6981		11.91	28.8							9.5		28.62	28.45	28.535	0.085							8.5	28.4	28.1527		28.2764	0.12365
0.7721	27.96			7.75	28.07			1.21	27.87				16.82	28.3				10.8	28.8044			12.89	29							10.5			28.51	28.51								9.5		28.488		28.488
0.8611	28.27			8.49	28.18			1.3	28.77				17.82	28.1				11.546	28.4838			13.36	29	29.05						11.5		27.3	28.054	27.677	0.377							10.5		28.6981		28.6981
0.9772	28.33			9.23	28.62			1.38	29.13				18.82	27.4				12.292	28.5033			13.83	29.1							12.5		27.4067	27.5544	27.4805	0.0738542							11.5	28.7	28.4838		28.5919	0.1081
1.0933	28.82	29.075		11.22	27.3			1.47	28.2				19.57	28.3				13.038	28.399	28.3662		14.3	27.5	27.9						13.5		27.255	27.6156	27.4353	0.180313							12.5		28.5033		28.5033
1.2094	28.98			12.25	27.68	27.4067		1.56	28.97				20.07	27.6	27.85			13.784	28.3334			14.76	28.3							14.5		27.66	27.495	27.5775	0.0825							13.5		28.3662	27.6	27.9831	0.3831
1.3256	29.49			12.69	27.24			1.65	28.42				20.82	28.1				14.53	27.9466			15.23	28.3	28.15						15.5		26.78	27.5233	27.1517	0.371667							14.5	28.7	27.9466		28.3233	0.3767
1.4417	28.88			12.91	27.3			1.73	28.34				21.57	26.9				16.3267	28.1333			15.7	28							16.5			26.7518	26.7518								15.5	29.2			29.2
1.5578	28.5			13.28	26.15	27.255		1.82	28.95				22.07	27.1	27.1			18.1233	28.3788			16.17	28	27.4						17.5		25.42	25.928	25.674	0.254							16.5	28.5	28.1333	26.7	27.7778	0.776661
1.6739	29.93			13.72	28.36			1.91	27.46				22.7	27.1				19.0217	28.0179	27.8206		16.64	26.8							18.5		25.51	25.0425	25.2762	0.23375							17.5	28.1			28.1
1.8134	29.03			14.38	27.66			2	28.49	28.1657			23.33	27.4				19.92	27.6232			17.11	28.1	27.75						19.5		25.58	25.2883	25.4342	0.145833							18.5	27.4	28.3788	27	27.5929	0.579189
1.9763	28.97			15.58	26.78			2.08	28.18				24.27	27.8				20.8625	26.979			17.58	27.4							20.5		25.39	25.5787	25.4844	0.094375							19.5	28.3	27.8206		28.0603	0.239725
2.1392	27.74	28.5		17.21	25.42			2.17	27.85				25.22	27.4	27.4667			21.805	27.1362			18.05	27	27.2						21.5			25.7	25.7								20.5	27.85	26.979	26.9	27.243	0.430424
2.3021	29.46			18.61	24.89	25.51		2.26	28.72				25.36	26.9				22.2763	26.5491	26.5655		18.52	27.4							22.5		24.32	26.0738	25.1969	0.876875							21.5	26.9	27.1362		27.0181	0.1181
2.4649	27.94			18.97	26.13			2.44	28.46				25.94	28.1				22.7475	26.5819			20.3	27.4	27.45						23.5		25.39	25.8757	25.6329	0.242857							22.5	27.1	26.5655	25.5	26.3885	0.66508
2.6278	28.68			19.43	25.58			2.63	27.34				26.51	27.2				23.69	27.4869			20.75	27.5							24.5		27.815	25.6975	26.7562	1.05875							23.5	27.4	27.4869		27.4434	0.04345
2.7907	28.13			20.26	25.2	25.39		2.81	28.12									24.6325	26.7539			21.19	27.4	27.5						25.5			25.1971	25.1971								24.5	27.8	26.7539	26.2	26.918	0.66342
2.9536	29.05			20.82	25.58			3	28.31	28.325								25.575	26.9277			21.64	27.6							26.5		25.3	25.6413	25.4706	0.170625							25.5	27.4667	26.9277		27.1972	0.269483
3.1372	28.33	28.536		22.11	24.32			3.18	28.24									26.5175	27.2526			22.08	27.9	27.9667																		26.5			26.8	26.8
3.3416	28.44			23.13	25.87	25.39		3.36	27.73													22.53	27.8
3.5459	28.46			23.41	24.94			3.55	28.49													22.98	28.2
3.7503	28.94			23.96	25.36			3.73	28.77													23.42	27.2	27.1
3.9547	28.51			24.52	25.38	27.815		3.91	28.41													23.89	27
4.1591	28.26	28.2575		24.98	25.74			4.1	28.91	28.38												24.31	27.3	27.1
4.3634	27.49			26.96	25.3			4.28	28.49													24.76	26.9
4.5678	28.49							4.47	28.46													25.21	27.5	27.3
4.7722	28.79							4.65	27.49													25.62	27.1
								4.83	28.55													26.04	27
								5.02	28.42	28.73												26.45	27.2
								5.2	28.92													26.87	27.4
								5.38	28.87
								5.57	28.71
								5.75	28.82
								5.94	28.64
								6.12	28.15	28.5967
								6.3	29.05
								6.49	28.34
								6.67	28.45
								6.78	28.95
								6.89	28.64
								7	28.83	28.8
								7.11	28.72
								7.23	28.77
								7.34	28.57
								7.45	28.68
								7.56	28.87
								7.67	28.63
								7.78	29.01
								7.89	29.12
								8	28.83	28.76
								8.11	28.23
								8.23	28.77
								8.34	28.83
								8.45	29.09
								8.56	28.87
								8.67	28.67
								8.78	28.62
								8.89	28.93
								9	27.82	28.45
								9.11	28.97
								9.23	29
								9.34	29.03
								9.45	28.3
								9.56	28.63
								9.67	27.78
								9.78	28.25
								9.89	28.27
								10	28.02	28.51
								10.11	28.27
								10.23	28.75
								10.34	27.73
								10.45	28.82
								10.56	28.43
								10.67	28.56
								10.73	28.86
								10.86	28.19
								10.93	28.5
								10.99	29.48
								11.05	28.14	28.054
								11.12	28.55
								11.18	28.65
								11.25	28.07
								11.31	28.15
								11.37	28.2
								11.44	29.31
								11.5	28.25
								11.56	28.16
								11.63	27.1
								11.69	28.09
								11.76	27.69
								11.82	27.18
								11.88	27.6
								11.95	27.67
								12.01	28.01	27.5544
								12.08	27.94
								12.14	28.1
								12.2	27.65
								12.27	27.75
								12.33	27.62
								12.4	26.51
								12.46	27.8
								12.52	28.3
								12.59	27.44
								12.65	27.7
								12.71	26.71
								12.78	27.78
								12.84	27.68
								12.91	26.6
								12.97	27.28
								13.03	28.03	27.6156
								13.1	26.95
								13.16	27.82
								13.23	27.57
								13.29	27.22
								13.35	27.37
								13.42	27.23
								13.48	28.15
								13.55	27.74
								13.61	27.75
								13.67	27.59
								13.74	27.58
								13.8	27.4
								13.86	28.47
								13.93	27.61
								13.99	27.37
								14.06	27.78	27.495
								14.12	27.87
								14.18	27.38
								14.25	27.11
								14.31	27.35
								14.38	27.07
								14.44	27.55
								14.6	27.71
								14.77	27.53
								14.93	27.6
								15.09	27.75	27.5233
								15.25	27.11
								15.42	27.64
								15.58	27.15
								15.74	27.75
								15.9	27.74
								16.07	27.4	26.7518
								16.23	27.53
								16.39	26.64
								16.46	27.16
								16.53	27.2
								16.59	26.06
								16.66	26.55
								16.73	26.42
								16.8	26.28
								16.87	26.55
								16.94	26.48
								17	26.34	25.928
								17.07	26.44
								17.14	26.36
								17.21	26.29
								17.28	25.91
								17.34	25.82
								17.41	25.77
								17.48	25.99
								17.55	25.92
								17.62	25.81
								17.68	25.4
								17.75	25.37
								17.82	25.92
								17.89	25.85
								17.96	25.73
								18.03	25.41	25.0425
								18.09	25.27
								18.16	25.59
								18.23	25.33
								18.3	25
								18.37	25.29
								18.43	25.28
								18.5	24.93
								18.57	24.43
								18.7	24.64
								18.84	24.65
								18.97	24.69
								19.1	25.31	25.2883
								19.23	24.96
								19.5	25.47
								19.63	25.43
								19.77	24.86
								19.9	25.7
								20.03	25.47	25.5787
								20.17	25.64
								20.3	25.19
								20.43	25.64
								20.56	26.09
								20.7	25.92
								20.83	25.17
								20.96	25.51
								21.1	25.54	25.7
								21.23	25.23
								21.36	26.25
								21.5	25.82
								21.63	25.66
								21.76	25.78
								21.89	25.62
								22.03	25.88	26.0738
								22.16	25.92
								22.29	26.04
								22.43	26.3
								22.56	26.1
								22.69	26.29
								22.82	25.97
								22.96	26.09
								23.09	26	25.8757
								23.22	25.84
								23.36	25.57
								23.49	25.57
								23.62	26.21
								23.76	26.21
								23.89	25.73
								24.02	25.43	25.6975
								24.15	25.31
								24.29	25.84
								24.42	25.58
								24.55	25.76
								24.69	25.56
								24.82	25.72
								24.95	26.38
								25.09	25.65	25.1971
								25.22	24.78
								25.35	25.01
								25.48	24.83
								25.62	25.39
								25.75	25.48
								25.88	25.24
								26.02	25.08	25.6413
								26.15	25.76
								26.28	26.01
								26.41	25.58
								26.55	25.27
								26.68	25.66
								26.81	26.06
								26.95	25.71
