# Supplementary material for: Glacial–interglacial changes and Holocene variations in Arabian Sea denitrification
Source: Copernicus journal article supplement (doi:10.5194/bg-15-507-2018), 2018-01-26
Supplement: Supplementary file [file bg-15-507-2018-supplement-title-page.pdf › bg-15-507-2018-supplement-title-page.pdf]

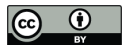

## *Supplement of*

# **Glacial–interglacial changes and Holocene variations in Arabian Sea denitrification**

**Birgit Gaye et al.**

*Correspondence to:* Birgit Gaye ([birgit.gaye@uni-hamburg.de](mailto:birgit.gaye@uni-hamburg.de))

- [bg-15-507-2018-supplement-title-page.pdf](#)
- [Supplement S3-S9.pdf](#)
- [Supplement Table S1\\_d15N Averages.xlsx](#)
- [Supplement Table S2\\_SST Averages.xlsx](#)

The copyright of individual parts of the supplement might differ from the CC BY 4.0 License.
